# Supplementary material for: Infrequent “chronic lymphocytic leukemia-specific” immunoglobulin stereotypes in aged individuals with or without low-count monoclonal B-cell lymphocytosis
Source: PubMed Central journal article supplement — Haematologica. 2021 Apr 1;106(4):1178–81. doi: 10.3324/haematol.2020.247908 (PMC8018099; doi:10.3324/haematol.2020.247908), 2021-04-01
Supplement: 2020_247908-DisclosuresContributions.pdf [file 2020_247908-DisclosuresContributions.pdf]

Haematologica  
HAEMATOL/2020/247908  
Version 3

Infrequent "chronic lymphocytic leukemia-specific" immunoglobulin  
stereotypes in aged individuals with or without low count monoclonal B  
cell lymphocytosis

Andreas Agathangelidis, Chrysi Galigalidou, Lydia Scarfò, Theodoros  
Moysiadis, Alessandra Rovida, Maria Gounari, Fotis Psomopoulos,  
Pamela Raghetti, Alex Galanis, Frederic Davi, Kostas Stamatopoulos,  
Anastasia Chatzidimitriou, and Paolo Ghia

Disclosures: AA received funding from Gilead. KS received honoraria from AbbVie, Gilead Science, Janssen and research funding from AbbVie and Janssen. PG received honoraria from AbbVie, Acerta, BeiGene, Gilead, Janssen, Sunesis and research funding from AbbVie, Gilead, Janssen, Novartis, Sunesis.

Contributions: A.A. designed the research, performed the experiments, analyzed the data and wrote the manuscript; C.G. analyzed the data and wrote the manuscript; L.S., A.R., M.G., P.R. assisted in experiments; T.M. performed statistical analysis; F.P. assisted in the data analysis; A.G. and F.D. supervised the research and wrote the manuscript; K.S., A.H. and P.G. designed and supervised the research and wrote the manuscript. All authors provided final approval of the manuscript.
