# Supplementary material for: Infrequent “chronic lymphocytic leukemia-specific” immunoglobulin stereotypes in aged individuals with or without low-count monoclonal B-cell lymphocytosis
Source: PubMed Central journal article supplement — Haematologica. 2021 Apr 1;106(4):1178–81. doi: 10.3324/haematol.2020.247908 (PMC8018099; doi:10.3324/haematol.2020.247908), 2021-04-01
Supplement: 2020_247908_AGATHANGELIDIS_SUPPL.pdf [file 2020_247908_AGATHANGELIDIS_SUPPL.pdf]

**Infrequent “chronic lymphocytic leukemia-specific” immunoglobulin stereotypes in aged individuals with or without low-count monoclonal B-cell lymphocytosis**

*Andreas Agathangelidis,<sup>1,2</sup> Chrysi Galigalidou,<sup>2,3</sup> Lydia Scarfò,<sup>1</sup> Theodoros Moysiadis,<sup>2,4</sup> Alessandra Rovià,<sup>1</sup> Maria Gounari,<sup>2</sup> Fotis Psomopoulos,<sup>2</sup> Pamela Ranzhetti,<sup>1</sup> Alex Galanis,<sup>3</sup> Frederic Davi,<sup>5</sup> Kostas Stamatopoulos,<sup>2,4</sup> Anastasia Chatzidimitriou<sup>2,4#</sup> and Paolo Ghia<sup>1#</sup> also on behalf of the Euroclonality NGS Working Group*

*<sup>1</sup>Strategic Research Program on CLL and B-Cell Neoplasia Unit, Division of Experimental Oncology, Università Vita-Salute San Raffaele and IRCCS Ospedale San Raffaele, Milan, Italy; <sup>2</sup>Institute of Applied Biosciences, Center for Research and Technology Hellas, Thessaloniki, Greece; <sup>3</sup>Department of Molecular Biology and Genetics (MBG), Democritus University of Thrace, Alexandroupolis, Greece; <sup>4</sup>Department of Molecular Medicine and Surgery, Karolinska Institute, Stockholm, Sweden and <sup>5</sup>Assistance Publique - Hôpitaux de Paris (AP-HP), Hôpital Pitié-Salpêtrière, Department of Biological Hematology, Sorbonne Université, UMR\_S 1138, Centre de Recherche des Cordeliers, Paris, France*

*#AC and PG contributed equally as co-senior authors.*

*Correspondence: ANASTASIA CHATZIDIMITRIOU - [achatzidimitriou@certh.gr](mailto:achatzidimitriou@certh.gr)*

*doi:10.3324/haematol.2020.247908*

## **Supplementary Methods**

### **Study group**

All samples of the present study were obtained from a cohort of individuals with LC-MBL from Val Borbera, a rural valley in Northern Italy, followed up over a period of >10 years. All LC-MBL clones persisted over this period of follow-up, however without significant size variations (data not shown). We did not observe any case of progression to HC-MBL or CLL during the follow-up period. Blood collection for the present study was performed over a period spanning between 2012 and 2014. The diagnosis of LC-MBL was performed using an established flow cytometry protocol, where up to 500,000 events were acquired for each sample according to the gating strategy described previously.<sup>1</sup> MBL cells were sorted in 12 cases: in 4/12 cases, paired normal B cell samples were also available. In the remaining 11 cases, peripheral blood mononuclear cells (PBMC) were the starting material as the sorting for MBL cells either failed or yielded very low cell numbers: in 4/11 cases, sorted normal B cell samples were also available. Blood samples from 6 individuals without MBL were collected as controls; naïve and memory B cells were sorted in 6 and 5 cases, respectively. Henceforth, the category of individuals without B cell expansions will be referred to as healthy. The median age was 75 years for individuals with “CLL-like” LC-MBL and 72 years for the age-matched, healthy individuals. The research protocol was approved by the Ethics Committee of the San Raffaele Scientific Institute; all study participants gave written informed consent in accordance with the Declaration of Helsinki.

### **Sample preparation, FACS analysis and sorting**

In the case of individuals with LC-MBL, samples were stained with anti-CD19, anti-CD5 and anti-CD20 antibodies and “CLL-like” LC-MBL populations<sup>2</sup> (CD19<sup>+</sup>CD5<sup>+</sup>CD20<sup>dim</sup>)<sup>1</sup> as well as normal B cells (CD19<sup>+</sup>CD20<sup>+</sup>CD5<sup>-</sup>) were flow-sorted. In the case of samples from

healthy individuals, the staining was performed with anti-IgD and anti-CD27 antibodies and the naïve (IgD<sup>+</sup>CD27<sup>-</sup>) and memory (IgD<sup>-</sup>CD27<sup>+</sup>) B cell populations were sorted. PBMC were isolated by density gradient centrifugation.

### **PCR amplification of IGHV-IGHD-IGHJ gene rearrangements, library preparation and high-throughput sequencing**

Total RNA was extracted and 1 µg was used for cDNA synthesis with the SuperScript II RT kit (Invitrogen Life technologies, MA, USA). PCR amplification of IGHV-IGHD-IGHJ gene rearrangements was performed with a novel protocol, developed by the Euroclonality-NGS Consortium (<https://www.euroclonalityngs.org/usr/pub/pub.php>) ([manuscript in preparation](#)). Primer sequences will be provided upon request. PCR products were purified with the QIAGEN DNA purification kit (QIAGEN, Germany). The TruSeq DNA LT Sample Preparation Kit (Illumina, CA, USA) was used for the preparation of sequencing libraries. Purity and size estimation of the libraries was performed on an Agilent Bioanalyzer using the Agilent High Sensitivity DNA kit (Agilent Technologies, CA, USA). The dsDNA HS Assay Kit was used for library quantification on a Qubit 3.0 fluorometer (ThermoFisher Scientific, MA, USA). Paired-end sequencing was performed using the MiSeq Reagent Kit v3 (2x300bp) on the MiSeq Benchtop Sequencer (Illumina, CA, USA).

### **Bioinformatics analysis**

Raw IGHV-IGHD-IGHJ gene rearrangement sequences were filtered using the Illumina signal-processing software. Sequence assignment to samples was performed based on the incorporated Illumina indexes and adapter sequences were trimmed. Subsequently, data filtering was performed through the application of an in-house, purpose-built

bioinformatics algorithm, based on the following criteria: (i) length and sequencing quality of raw reads; (ii) quality of the variable heavy complementarity determining region 3 (VH CDR3); (iii) length and overall quality of the final, full-length sequences. Filtered-in sequences were analyzed with the use of IMGT/HighV-QUEST.<sup>3</sup> Raw NGS data are available at the European Nucleotide Archive (ENA) under the identifier PRJEB29674.

### **Metadata analysis**

Metadata was processed by an in-house bioinformatics analytical toolbox that performs detailed analysis, including: (i) BcR IG clonotype computation, (ii) clonality assessment, (iii) BcR IG gene repertoire extraction and (iv) somatic hypermutation (SHM) analysis. Only productive, in-frame IGHV-IGHD-IGHJ gene rearrangements were analyzed. Clonotypes were computed as unique pairs of IGHV genes and VH CDR3 amino acid sequences within a given sample. Single-sequence clonotypes were characterized as singletons and those represented by  $\geq 2$  sequences as expanded.

### **Clonality assessment**

BcR IG clonotypes were considered for clonality assessment. First, the relative frequency of each clonotype/sample was calculated. As a next step, we sought to identify clonal expansions that would be represented at a meaningful frequency, hence potentially more relevant. Instead of choosing an arbitrary cutoff, we performed data-driven statistical analysis based on the frequency distribution of clonotypes from all samples (see Statistical analysis section). This led to the identification of 0.92% as a discerning frequency above which a given clonotype would be considered abundant. Clonality

assessment in each sample category was performed through calculating the average value of the cumulative frequencies of abundant clonotypes.

### **Identification of “CLL-specific” stereotyped BcR IG gene rearrangements**

The dataset of abundant BcR IG clonotypes was scanned for the presence of clonotypes highly homologous to those of CLL (“CLL-specific”). To this end, we cross-checked all abundant BcR IG clonotypes of the present study across the IMGT/CLL-DB (<http://www.imgt.org/CLLDBInterface/query>), a database containing 30,221 Sanger-sequenced clonotypic IGHV-IGHD-IGHJ gene rearrangement sequences from patients with CLL using an established, purpose-built bioinformatics method.<sup>4</sup>

### **IGHV gene repertoire analysis**

The analysis of the IGHV gene repertoire was performed at the clonotype level. The following sample categories were included in the analysis: (i) MBL cell samples and (ii) normal B cells from individuals with LC-MBL, as well as (iii) normal B cells from healthy individuals without LC-MBL (grouped naïve and memory cell samples from each healthy individual).

### **Statistical analysis**

Descriptive statistics for qualitative variables included counts and frequency distributions. For quantitative variables, statistical measures included the mean, median, and min-max values. The significance of bivariate/multivariate relationships between variables was assessed using the unpaired t-test, and the non-parametric Kruskal-Wallis and Mann-Whitney tests. The definition of the most appropriate threshold representing

the discerning value between abundant and low-frequent clonotypes, was performed using a method based on analysis with receiver operating characteristic (ROC) curves. For all comparisons a significance level of  $\alpha=0.05$  was set. All statistical analyses were performed with SPSS V-22 and R V-3.4.3.

## References

1. Fazi C, Scarfo L, Pecciarini L, et al. General population low-count CLL-like MBL persists over time without clinical progression, although carrying the same cytogenetic abnormalities of CLL. *Blood*. 2011;118:6618-6625.
2. Marti GE, Rawstron AC, Ghia P, et al. Diagnostic criteria for monoclonal B-cell lymphocytosis. *Br J Haematol*. 2005;130:325-332.
3. Alamyar E, Duroux P, Lefranc MP, Giudicelli V. IMGT((R)) tools for the nucleotide analysis of immunoglobulin (IG) and T cell receptor (TR) V-(D)-J repertoires, polymorphisms, and IG mutations: IMGT/V-QUEST and IMGT/HighV-QUEST for NGS. *Methods Mol Biol*. 2012;882:569-604.
4. Agathangelidis A, Darzentas N, Hadzidimitriou A, et al. Stereotyped B-cell receptors in one-third of chronic lymphocytic leukemia: a molecular classification with implications for targeted therapies. *Blood*. 2012;119:4467-4475.

## Supplemental Tables

**Supplemental Table 1.** Basic characteristics for individuals with LC-MBL and healthy individuals without clonal B cell expansions from the present study.

| Sample ID | Sample category        | Sex | Age | Light chain | CLL clone, cells/ $\mu$ l | Cytogenetic aberrations |
|-----------|------------------------|-----|-----|-------------|---------------------------|-------------------------|
| MBL-1     | MBL cells, LC-MBL      | F   | 77  | Kappa       | 7.3                       | n/d                     |
| bMBL-1    | Normal B cells, LC-MBL |     |     |             |                           |                         |
| MBL-2     | MBL cells, LC-MBL      | M   | 81  | Kappa       | 0.7                       | n/d                     |
| MBL-3     | MBL cells, LC-MBL      | M   | 70  | Kappa       | 221                       | normal                  |
| bMBL-3    | Normal B cells, LC-MBL |     |     |             |                           |                         |
| MBL-4     | MBL cells, LC-MBL      | F   | 70  | Lambda      | 0.4                       | del(13q), del(17p)      |
| MBL-5     | MBL cells, LC-MBL      | F   | 75  | Kappa       | 5.3                       | n/d                     |
| MBL-6     | MBL cells, LC-MBL      | M   | 58  | Lambda      | 265                       | del(13q)                |
| MBL-7     | MBL cells, LC-MBL      | F   | 75  | Kappa       | 96.7                      | del(13q)                |
| MBL-8     | MBL cells, LC-MBL      | F   | 75  | Kappa       | 0.5                       | n/d                     |
| MBL-9     | MBL cells, LC-MBL      | M   | 77  | Lambda      | 6.3                       | n/d                     |
| MBL-10    | MBL cells, LC-MBL      | M   | 84  | Kappa       | 6.6                       | n/d                     |
| bMBL-10   | Normal B cells, LC-MBL |     |     |             |                           |                         |
| MBL-11    | MBL cells, LC-MBL      | M   | 89  | Kappa       | 189.8                     | normal                  |
| MBL-12    | MBL cells, LC-MBL      | F   | 71  | Kappa       | 1.5                       | normal                  |
| bMBL-12   | Normal B cells, LC-MBL |     |     |             |                           |                         |
| mcMBL-13  | PBMC, LC-MBL           | M   | 71  | Lambda      | -                         | n/d                     |
| bMBL-13   | Normal B cells, LC-MBL |     |     |             |                           |                         |
| mcMBL-14  | PBMC, LC-MBL           | F   | 71  | Kappa       | -                         | del(13q)                |
| bMBL-14   | Normal B cells, LC-MBL |     |     |             |                           |                         |
| mcMBL-15  | PBMC, LC-MBL           | M   | 85  | Kappa       | -                         | n/d                     |
| mcMBL-16  | PBMC, LC-MBL           | M   | 75  | Kappa       | -                         | n/d                     |
| mcMBL-17  | PBMC, LC-MBL           | M   | 74  | Kappa       | -                         | n/d                     |
| bMBL-17   | Normal B cells, LC-MBL |     |     |             |                           |                         |
| mcMBL-18  | PBMC, LC-MBL           | M   | 77  | Kappa       | -                         | n/d                     |
| mcMBL-19  | PBMC, LC-MBL           | M   | 73  | Kappa       | -                         | n/d                     |

|          |                         |   |    |            |   |                       |
|----------|-------------------------|---|----|------------|---|-----------------------|
| bMBL-19  | Normal B cells, LC-MBL  |   |    |            |   |                       |
| mcMBL-20 | PBMC, LC-MBL            | F | 68 | Kappa      | - | n/d                   |
| mcMBL-21 | PBMC, LC-MBL            | M | 75 | Kappa      | - | n/d                   |
| mcMBL-22 | PBMC, LC-MBL            | M | 67 | Kappa      | - | del(13q),<br>del(17p) |
| mcMBL-23 | PBMC, LC-MBL            | M | 69 | polyclonal | - | n/d                   |
| naB-1    | Naïve B cells, Healthy  | M | 71 | -          | - |                       |
| meB-1    | Memory B cells, Healthy |   |    |            |   |                       |
| naB-2    | Naïve B cells, Healthy  | F | 68 | -          | - |                       |
| meB-2    | Memory B cells, Healthy |   |    |            |   |                       |
| naB-3    | Naïve B cells, Healthy  | M | 74 | -          | - |                       |
| meB-3    | Memory B cells, Healthy |   |    |            |   |                       |
| naB-4    | Naïve B cells, Healthy  | M | 72 | -          | - |                       |
| meB-4    | Memory B cells, Healthy |   |    |            |   |                       |
| naB-5    | Naïve B cells, Healthy  | F | 76 | -          | - |                       |
| meB-5    | Memory B cells, Healthy |   |    |            |   |                       |
| naB-6    | Naïve B cells, Healthy  | F | 69 | -          | - |                       |

n/d: not determined



**Supplemental Table 2.** Basic information in regard to the number of BcR IG raw and filtered sequences and clonotypes for each individual sample category.

|                                  | MBL cells,<br>LC-MBL |                            | PBMC,<br>LC-MBL |                            | Normal B cells,<br>LC-MBL |                            | Naïve B cells,<br>Healthy |                            | Memory B cells,<br>Healthy |                            |
|----------------------------------|----------------------|----------------------------|-----------------|----------------------------|---------------------------|----------------------------|---------------------------|----------------------------|----------------------------|----------------------------|
|                                  | total<br>number      | average<br>per<br>category | total<br>number | average<br>per<br>category | total<br>number           | average<br>per<br>category | total<br>number           | average<br>per<br>category | total<br>number            | average<br>per<br>category |
| Total raw reads                  | 4542318              | 378527                     | 5353773         | 486707                     | 3212762                   | 401595                     | 2565597                   | 427600                     | 2061525                    | 412305                     |
| Filtered-in reads                | 4151863              | 345989                     | 4342415         | 394765                     | 2634174                   | 329272                     | 2042235                   | 226915                     | 1974080                    | 394816                     |
| Filtered-out reads               | 390455               | 32538                      | 1011358         | 91942                      | 578588                    | 72324                      | 523362                    | 58151                      | 87445                      | 17489                      |
| Unique clonotypes                | 25649                | 2137                       | 70894           | 6445                       | 222012                    | 27752                      | 169578                    | 28263                      | 103890                     | 20778                      |
| Expanded clonotypes<br>(>1 read) | 9014                 | 751                        | 29587           | 2690                       | 88366                     | 11046                      | 67358                     | 11226                      | 43750                      | 8750                       |
| Singletons                       | 16635                | 1386                       | 41307           | 3755                       | 133646                    | 16706                      | 102220                    | 17037                      | 60140                      | 12028                      |

**Supplemental Table 3.** List of abundant clonotypes (individual frequency of >0.92%) from each sample of the study cohort.

| Sample ID | Sample Category   | IGHV gene  | SHM status, % | IGHD gene | IGHJ gene | CDR3 sequence           | CDR3 length | Frequency, % |
|-----------|-------------------|------------|---------------|-----------|-----------|-------------------------|-------------|--------------|
| MBL-1     | MBL cells, LC-MBL | IGHV1-3    | 90,28         | IGHD5-18  | IGHJ3     | ARGIRVGYDYGYDVFDI       | 17          | 86.28        |
| MBL-1     | MBL cells, LC-MBL | IGHV4-59   | 96,49         | IGHD2-2   | IGHJ4     | ARVANAVAGLGIFYDY        | 15          | 1.57         |
| MBL-1     | MBL cells, LC-MBL | IGHV3-30   | 96,75         | IGHD2-21  | IGHJ4     | AKKEGVYCRGGGCYYFDY      | 18          | 0.92         |
| MBL-2     | MBL cells, LC-MBL | IGHV3-30   | 93,4          | IGHD2-2   | IGHJ4     | AKDHGSTSWYYLDY          | 14          | 69.10        |
| MBL-2     | MBL cells, LC-MBL | IGHV4-30-4 | 97,25         | IGHD5-12  | IGHJ4     | VSIRGYDTN               | 9           | 5.02         |
| MBL-2     | MBL cells, LC-MBL | IGHV3-30   | 96,53         | IGHD3-3   | IGHJ3     | VGESIIGGDAFDL           | 13          | 5.01         |
| MBL-2     | MBL cells, LC-MBL | IGHV1-8    | 92,36         | IGHD3-22  | IGHJ5     | ARMDKKENDGSDWFDP        | 16          | 2.68         |
| MBL-2     | MBL cells, LC-MBL | IGHV1-8    | 96,18         | IGHD6-13  | IGHJ4     | ARGLADNTDY              | 10          | 2.49         |
| MBL-2     | MBL cells, LC-MBL | IGHV3-7    | 93,42         | IGHD6-19  | IGHJ4     | VRVIAVAGTLGYFDQ         | 15          | 0.96         |
| MBL-3     | MBL cells, LC-MBL | IGHV1-8    | 95,83         | IGHD6-13  | IGHJ4     | ARGLADNTDY              | 10          | 97.55        |
| MBL-4     | MBL cells, LC-MBL | IGHV4-34   | 97,54         | IGHD3-3   | IGHJ4     | AGAVEWLLWSRNRYYFDY      | 18          | 90.50        |
| MBL-4     | MBL cells, LC-MBL | IGHV3-66   | 96,14         | IGHD2-2   | IGHJ6     | ARDSHFGAVPGAEGRYSYYGMDV | 23          | 1.75         |
| MBL-5     | MBL cells, LC-MBL | IGHV3-7    | 89,24         | IGHD6-19  | IGHJ4     | ACGGGWLVDSD             | 10          | 12.53        |
| MBL-5     | MBL cells, LC-MBL | IGHV1-18   | 95,83         | IGHD1-14  | IGHJ4     | ARDRSNKDY               | 9           | 1.84         |
| MBL-6     | MBL cells, LC-MBL | IGHV5-51   | 93,06         | IGHD4-17  | IGHJ4     | ARQWVSTAITALPDY         | 15          | 93.76        |
| MBL-7     | MBL cells, LC-MBL | IGHV2-5    | 93,47         | IGHD2-2   | IGHJ5     | ANRRQYNTNWDAGWFDP       | 17          | 97.15        |
| MBL-8     | MBL cells, LC-MBL | IGHV3-15   | 96,94         | IGHD5-18  | IGHJ6     | TTAPRWIQVRGSYYYMDV      | 18          | 97.54        |
| MBL-9     | MBL cells, LC-MBL | IGHV3-15   | 96,94         | IGHD6-19  | IGHJ4     | TIREGNGWYIY             | 11          | 42.47        |
| MBL-9     | MBL cells, LC-MBL | IGHV3-7    | 96,88         | IGHD3-22  | IGHJ4     | ATPPYYDSSGNYPDY         | 16          | 2.04         |
| MBL-10    | MBL cells, LC-MBL | IGHV1-8    | 96,53         | IGHD3-9   | IGHJ4     | ARRLPGREVTQLDY          | 14          | 35.40        |
| MBL-10    | MBL cells, LC-MBL | IGHV3-7    | 96,53         | IGHD6-6   | IGHJ4     | AVAPYSSSSSQRY           | 13          | 22.58        |
| MBL-10    | MBL cells, LC-MBL | IGHV3-7    | 97,22         | IGHD2-2   | IGHJ6     | ATPPYCDTSCPATDV         | 15          | 11.24        |
| MBL-10    | MBL cells, LC-MBL | IGHV4-34   | 96,49         | IGHD6-13  | IGHJ6     | ARGGYSVTSLSKYGMDV       | 16          | 5.36         |
| MBL-10    | MBL cells, LC-MBL | IGHV3-7    | 96,88         | IGHD2-2   | IGHJ4     | AGDCTSTTCFFDF           | 13          | 4.43         |
| MBL-10    | MBL cells, LC-MBL | IGHV4-59   | 91,58         | IGHD3-22  | IGHJ4     | ARFTYDSGGHYLQY          | 14          | 4.36         |

|        |                   |            |       |          |       |                     |    |       |
|--------|-------------------|------------|-------|----------|-------|---------------------|----|-------|
| MBL-10 | MBL cells, LC-MBL | IGHV3-53   | 97,19 | IGHD1-1  | IGHJ5 | ARVSGWRIS           | 9  | 1.70  |
| MBL-10 | MBL cells, LC-MBL | IGHV3-74   | 95,49 |          | IGHJ6 | ARGNYYGMDV          | 10 | 1.39  |
| MBL-10 | MBL cells, LC-MBL | IGHV3-53   | 97,54 | IGHD6-19 | IGHJ4 | VRVRGWSHY           | 9  | 1.28  |
| MBL-10 | MBL cells, LC-MBL | IGHV3-7    | 97,22 | IGHD6-13 | IGHJ6 | VRDRGDDTSSTLYGMDV   | 17 | 1.21  |
| MBL-10 | MBL cells, LC-MBL | IGHV1-18   | 97,57 | IGHD6-6  | IGHJ4 | ARGEYYFDY           | 9  | 1.10  |
| MBL-11 | MBL cells, LC-MBL | IGHV1-18   | 89,58 | IGHD4-11 | IGHJ6 | ARGTRVTTSPYYYYMDV   | 17 | 97.86 |
| MBL-11 | MBL cells, LC-MBL | IGHV1-18   | 89,93 | IGHD4-11 | IGHJ6 | ARGTRVTTSPYYYYMDV   | 16 | 1.07  |
| MBL-12 | MBL cells, LC-MBL | IGHV1-2    | 93,75 | IGHD4-23 | IGHJ4 | AREDYGGNF           | 9  | 17.78 |
| MBL-12 | MBL cells, LC-MBL | IGHV3-13   | 96,49 | IGHD6-13 | IGHJ4 | ARSYTTSWPTFDY       | 13 | 3.60  |
| MBL-12 | MBL cells, LC-MBL | IGHV3-53   | 99,65 | IGHD3-10 | IGHJ4 | ARIVGAFIT           | 9  | 3.07  |
| MBL-12 | MBL cells, LC-MBL | IGHV3-72   | 87,76 | IGHD1-1  | IGHJ4 | VRENWYRFDY          | 10 | 2.18  |
| MBL-12 | MBL cells, LC-MBL | IGHV3-30   | 94,79 | IGHD2-15 | IGHJ6 | AKDLQTADTDYYYYGMDV  | 17 | 2.14  |
| MBL-12 | MBL cells, LC-MBL | IGHV4-4    | 99,3  | IGHD3-3  | IGHJ6 | ARDRQIFGVVIEDYGMDV  | 18 | 1.93  |
| MBL-12 | MBL cells, LC-MBL | IGHV4-59   | 91,93 | IGHD6-19 | IGHJ4 | ATKVGPRDWNPADY      | 14 | 1.84  |
| MBL-12 | MBL cells, LC-MBL | IGHV4-4    | 100   | IGHD2-2  | IGHJ6 | ARVVGGMMDV          | 10 | 1.76  |
| MBL-12 | MBL cells, LC-MBL | IGHV3-23   | 94,1  | IGHD2-2  | IGHJ5 | AKDRSPCGTLNCAKPGDY  | 18 | 1.70  |
| MBL-12 | MBL cells, LC-MBL | IGHV3-33   | 93,75 | IGHD3-22 | IGHJ6 | ARDFYYNNMDRAADV     | 15 | 1.64  |
| MBL-12 | MBL cells, LC-MBL | IGHV4-34   | 96,49 | IGHD2-2  | IGHJ4 | ARGGGYCSSTSCYHDY    | 16 | 1.57  |
| MBL-12 | MBL cells, LC-MBL | IGHV3-30-3 | 100   | IGHD6-19 | IGHJ4 | ARDPPLHSSGWYEVGYFDY | 19 | 1.47  |
| MBL-12 | MBL cells, LC-MBL | IGHV3-48   | 95,83 | IGHD3-22 | IGHJ4 | ASLTYYYDSSGYRAFDC   | 17 | 1.45  |
| MBL-12 | MBL cells, LC-MBL | IGHV3-30-3 | 99,65 | IGHD1-26 | IGHJ4 | AREGEVGATVATDY      | 14 | 1.45  |
| MBL-12 | MBL cells, LC-MBL | IGHV4-4    | 94,39 | IGHD7-27 | IGHJ4 | ATDPPGTGNYFDF       | 13 | 1.45  |
| MBL-12 | MBL cells, LC-MBL | IGHV4-34   | 100   | IGHD5-12 | IGHJ3 | AREGAYSGYVAAAFDI    | 16 | 1.44  |
| MBL-12 | MBL cells, LC-MBL | IGHV3-23   | 94,79 | IGHD6-13 | IGHJ4 | AKLIAAGDRPQDY       | 13 | 1.43  |
| MBL-12 | MBL cells, LC-MBL | IGHV3-30   | 100   | IGHD6-19 | IGHJ4 | AKDWSGCLDY          | 10 | 1.42  |
| MBL-12 | MBL cells, LC-MBL | IGHV4-30-4 | 89,69 | IGHD5-12 | IGHJ5 | SRVEDVDIAYFDP       | 13 | 1.38  |
| MBL-12 | MBL cells, LC-MBL | IGHV3-11   | 98,61 | IGHD3-9  | IGHJ4 | AKHLAGDILTGYRGFYD   | 18 | 1.37  |
| MBL-12 | MBL cells, LC-MBL | IGHV3-23   | 97,57 | IGHD1-26 | IGHJ4 | AAHEGGDSGSYNFDH     | 15 | 1.37  |

|          |                   |            |       |          |       |                            |    |      |
|----------|-------------------|------------|-------|----------|-------|----------------------------|----|------|
| MBL-12   | MBL cells, LC-MBL | IGHV3-9    | 99,31 | IGHD5-24 | IGHJ6 | AKDIGMAITYYGMDV            | 15 | 1.31 |
| MBL-12   | MBL cells, LC-MBL | IGHV4-31   | 96,91 | IGHD5-18 | IGHJ4 | AFTRGYTYGSFDS              | 13 | 1.26 |
| MBL-12   | MBL cells, LC-MBL | IGHV3-33   | 95,14 | IGHD3-9  | IGHJ4 | ARSPSAFGTRVLMDY            | 15 | 1.25 |
| MBL-12   | MBL cells, LC-MBL | IGHV4-59   | 94,04 | IGHD3-10 | IGHJ6 | ARDQDGGWPLVGLDV            | 15 | 1.23 |
| MBL-12   | MBL cells, LC-MBL | IGHV3-30-3 | 96,18 | IGHD6-6  | IGHJ1 | ARDNSSAQWFQH               | 12 | 1.23 |
| MBL-12   | MBL cells, LC-MBL | IGHV3-30   | 97,57 | IGHD3-22 | IGHJ3 | ARDLSVSVVVITIDPLDI         | 18 | 1.22 |
| MBL-12   | MBL cells, LC-MBL | IGHV3-11   | 100   | IGHD5-12 | IGHJ5 | AREESQGRGYGGYEEGWV         | 18 | 1.22 |
| MBL-12   | MBL cells, LC-MBL | IGHV3-30   | 99,65 | IGHD6-19 | IGHJ6 | AKITVAGQYHYYYYYTMDV        | 18 | 1.20 |
| MBL-12   | MBL cells, LC-MBL | IGHV4-34   | 93,68 | IGHD3-16 | IGHJ5 | ARGRVLLRPARGGHWFDP         | 19 | 1.20 |
| MBL-12   | MBL cells, LC-MBL | IGHV3-11   | 99,31 | IGHD2-21 | IGHJ4 | ARDFYCGGDCYALDF            | 15 | 1.19 |
| MBL-12   | MBL cells, LC-MBL | IGHV4-31   | 100   | IGHD2-2  | IGHJ4 | ASACSSSTSCGENY             | 13 | 1.12 |
| MBL-12   | MBL cells, LC-MBL | IGHV1-8    | 98,96 | IGHD3-3  | IGHJ5 | ARGFWSGYYLEGWFPD           | 16 | 1.08 |
| MBL-12   | MBL cells, LC-MBL | IGHV3-30-3 | 95,66 | IGHD6-25 | IGHJ4 | ARAPAGDAAMGFDY             | 14 | 0.99 |
| MBL-12   | MBL cells, LC-MBL | IGHV3-30   | 93,72 | IGHD2-21 | IGHJ4 | AKDFGGYYFDY                | 11 | 0.98 |
| MBL-12   | MBL cells, LC-MBL | IGHV3-48   | 95,78 | IGHD5-12 | IGHJ6 | ARGGEDKIRGTYRPSLSHAMDV     | 22 | 0.95 |
| MBL-12   | MBL cells, LC-MBL | IGHV4-30-4 | 97,78 | IGHD2-2  | IGHJ6 | ARDWGDGYCSSTSCHNGMDV       | 20 | 0.95 |
| MBL-12   | MBL cells, LC-MBL | IGHV2-5    | 94,35 | IGHD6-25 | IGHJ3 | VHSP I I F V F K G S F D I | 15 | 0.94 |
| mcMBL-13 | PBMC, LC-MBL      | IGHV4-31   | 96,55 | IGHD4-17 | IGHJ6 | ARDYGDSRRYYYGMDV           | 16 | 1.73 |
| mcMBL-13 | PBMC, LC-MBL      | IGHV4-34   | 88,42 | IGHD1-14 | IGHJ5 | VRNMPNSHTPGWFDP            | 15 | 1.19 |
| mcMBL-13 | PBMC, LC-MBL      | IGHV4-30-4 | 96,56 | IGHD3-22 | IGHJ6 | ARDFNYDSSDFYGMDV           | 17 | 1.11 |
| mcMBL-13 | PBMC, LC-MBL      | IGHV3-53   | 100   | IGHD6-13 | IGHJ6 | AREASSWSVGLWYYGMDV         | 19 | 1.08 |
| mcMBL-13 | PBMC, LC-MBL      | IGHV3-74   | 91,32 | IGHD6-25 | IGHJ6 | ARRDQQPLKYMDV              | 13 | 1.06 |
| mcMBL-13 | PBMC, LC-MBL      | IGHV3-30   | 97,92 | IGHD2-2  | IGHJ6 | AKEGRYCSSTSSCYYGMDV        | 19 | 1.05 |
| mcMBL-13 | PBMC, LC-MBL      | IGHV3-33   | 97,57 | IGHD6-13 | IGHJ6 | ARDGQQLANYAMDV             | 14 | 1.04 |
| mcMBL-13 | PBMC, LC-MBL      | IGHV3-48   | 96,78 | IGHD6-6  | IGHJ3 | ASGVYDSPPEDAFHI            | 15 | 0.95 |
| mcMBL-13 | PBMC, LC-MBL      | IGHV3-74   | 94,98 | IGHD3-3  | IGHJ6 | ARQLGLYLPLDHLDV            | 15 | 0.95 |
| mcMBL-13 | PBMC, LC-MBL      | IGHV3-53   | 97,83 | IGHD3-9  | IGHJ5 | ARGELRYFDWARFDP            | 15 | 0.93 |

|          |              |            |       |          |       |                          |    |      |
|----------|--------------|------------|-------|----------|-------|--------------------------|----|------|
| mcMBL-14 | PBMC, LC-MBL | IGHV3-7    | 91,32 | IGHD2-2  | IGHJ4 | ARGPGYLIDF               | 10 | 7.95 |
| mcMBL-14 | PBMC, LC-MBL | IGHV3-9    | 90,62 | IGHD6-19 | IGHJ4 | VRVNSEISVAGREFDL         | 16 | 1.12 |
| mcMBL-14 | PBMC, LC-MBL | IGHV4-34   | 98,6  | IGHD6-13 | IGHJ4 | ARVNRLGIAAAGPFDY         | 16 | 1.08 |
| mcMBL-14 | PBMC, LC-MBL | IGHV4-34   | 100   | IGHD2-21 | IGHJ6 | ARGPVVVTARYGMDV          | 15 | 1.06 |
| mcMBL-14 | PBMC, LC-MBL | IGHV4-31   | 94,56 | IGHD3-9  | IGHJ4 | ARGGWLRRHIDY             | 12 | 1.00 |
| mcMBL-14 | PBMC, LC-MBL | IGHV3-21   | 96,71 | IGHD5-12 | IGHJ6 | ARDGGPLYYYGMDV           | 14 | 0.97 |
| mcMBL-14 | PBMC, LC-MBL | IGHV3-74   | 93,45 | -        | IGHJ6 | ARERV                    | 5  | 0.95 |
| mcMBL-14 | PBMC, LC-MBL | IGHV4-34   | 97,64 | IGHD3-22 | IGHJ4 | ARSSYDSSGGYHGSDY         | 16 | 0.94 |
| mcMBL-14 | PBMC, LC-MBL | IGHV3-30   | 94,79 | IGHD4-11 | IGHJ4 | AKGDSSTSCYDL             | 12 | 0.93 |
| mcMBL-15 | PBMC, LC-MBL | IGHV3-30   | 100   | IGHD4-17 | IGHJ4 | AKDQEPTTVTTSFDY          | 15 | 5.37 |
| mcMBL-15 | PBMC, LC-MBL | IGHV4-59   | 100   | IGHD3-3  | IGHJ4 | ARSDDFWVSGTGNV           | 13 | 5.36 |
| mcMBL-15 | PBMC, LC-MBL | IGHV3-30-3 | 100   | IGHD1-1  | IGHJ4 | ARGTRTRLGYFDY            | 13 | 5.25 |
| mcMBL-15 | PBMC, LC-MBL | IGHV3-30-3 | 96,18 | IGHD2-15 | IGHJ4 | ARDEGYCNDDRCSQGNFDY      | 19 | 4.97 |
| mcMBL-15 | PBMC, LC-MBL | IGHV3-30   | 99,65 | IGHD6-6  | IGHJ6 | AKDRIAARPRRYYYGMDV       | 19 | 4.18 |
| mcMBL-15 | PBMC, LC-MBL | IGHV3-33   | 100   | IGHD1-26 | IGHJ4 | ARDGPHVGFYD              | 11 | 4.16 |
| mcMBL-15 | PBMC, LC-MBL | IGHV3-64   | 100   | IGHD6-19 | IGHJ4 | ARGRNIAVAGLLGY           | 14 | 4.09 |
| mcMBL-15 | PBMC, LC-MBL | IGHV3-21   | 99,65 | IGHD3-22 | IGHJ4 | ARGLRDYYYDSSPFYD         | 16 | 3.53 |
| mcMBL-15 | PBMC, LC-MBL | IGHV3-48   | 100   | IGHD2-15 | IGHJ6 | ARGGREWDIVVVVAAFYGMDV    | 21 | 3.41 |
| mcMBL-15 | PBMC, LC-MBL | IGHV3-30-3 | 100   | IGHD5-24 | IGHJ6 | AREMATIGVGMDV            | 13 | 3.36 |
| mcMBL-15 | PBMC, LC-MBL | IGHV4-34   | 100   | IGHD6-25 | IGHJ4 | ARRRLTQYYFDY             | 12 | 3.28 |
| mcMBL-15 | PBMC, LC-MBL | IGHV3-9    | 94,44 | IGHD5-12 | IGHJ6 | AKDIGKWPYHYSRLNSYYYYGMDV | 23 | 3.19 |
| mcMBL-15 | PBMC, LC-MBL | IGHV3-48   | 99,65 | IGHD3-22 | IGHJ6 | ARDYYDSSGGYGYYYGMDV      | 21 | 3.06 |
| mcMBL-15 | PBMC, LC-MBL | IGHV4-31   | 100   | IGHD3-22 | IGHJ6 | ARAVYDSSGYFYYGMDV        | 17 | 2.93 |
| mcMBL-15 | PBMC, LC-MBL | IGHV3-74   | 100   | IGHD6-6  | IGHJ4 | ARDPSIAARPGVWGNYYFDY     | 20 | 2.92 |
| mcMBL-15 | PBMC, LC-MBL | IGHV1-69   | 100   | IGHD6-6  | IGHJ6 | AGQLQGGYYYGMDV           | 15 | 2.64 |
| mcMBL-15 | PBMC, LC-MBL | IGHV3-7    | 100   | IGHD3-22 | IGHJ5 | ARELARITMIVVVMGNWFDP     | 20 | 2.59 |
| mcMBL-15 | PBMC, LC-MBL | IGHV2-70   | 98,97 | IGHD2-2  | IGHJ3 | ARIERTIDAFDI             | 12 | 2.46 |
| mcMBL-15 | PBMC, LC-MBL | IGHV3-15   | 98,64 | IGHD3-10 | IGHJ5 | TQMVRGVTSYATKRGWFDP      | 19 | 2.34 |

|          |              |            |       |          |       |                           |    |      |
|----------|--------------|------------|-------|----------|-------|---------------------------|----|------|
| mcMBL-15 | PBMC, LC-MBL | IGHV3-30-3 | 100   | IGHD3-10 | IGHJ4 | AREGPARRYGSGSSHFDY        | 18 | 2.32 |
| mcMBL-15 | PBMC, LC-MBL | IGHV1-18   | 100   | IGHD2-15 | IGHJ4 | ARVRRVVAAMFDY             | 13 | 2.18 |
| mcMBL-15 | PBMC, LC-MBL | IGHV5-51   | 100   | IGHD1-26 | IGHJ4 | ARRNSGSYNFDY              | 12 | 2.08 |
| mcMBL-15 | PBMC, LC-MBL | IGHV3-30   | 100   | IGHD5-12 | IGHJ6 | AKCLRSKTGDYGM DV          | 15 | 2.00 |
| mcMBL-15 | PBMC, LC-MBL | IGHV1-18   | 94,79 | IGHD5-18 | IGHJ4 | TRDSIYRGSPTGKNDY          | 16 | 1.97 |
| mcMBL-15 | PBMC, LC-MBL | IGHV3-13   | 100   | IGHD1-26 | IGHJ3 | ARAPYSGSYSGAFDI           | 15 | 1.86 |
| mcMBL-15 | PBMC, LC-MBL | IGHV4-61   | 100   | IGHD3-22 | IGHJ6 | ARGTRTYYYDSSGYSPWYYYYGMDV | 26 | 1.71 |
| mcMBL-15 | PBMC, LC-MBL | IGHV4-34   | 100   | IGHD5-12 | IGHJ4 | ARGWLQDQ                  | 8  | 1.71 |
| mcMBL-15 | PBMC, LC-MBL | IGHV3-53   | 98,95 | IGHD3-10 | IGHJ4 | ARVKSIFYYYGY              | 11 | 1.71 |
| mcMBL-15 | PBMC, LC-MBL | IGHV3-23   | 100   | IGHD6-13 | IGHJ3 | AKASSSWHYDAFDI            | 14 | 1.66 |
| mcMBL-15 | PBMC, LC-MBL | IGHV3-23   | 100   | IGHD5-24 | IGHJ4 | ARSMDIRDGYNLVYFDY         | 17 | 1.29 |
| mcMBL-15 | PBMC, LC-MBL | IGHV3-21   | 93,4  | IGHD2-21 | IGHJ4 | ARDSLDCGGDCYSVYYFDC       | 19 | 1.21 |
| mcMBL-15 | PBMC, LC-MBL | IGHV5-51   | 93,4  | IGHD5-12 | IGHJ4 | ASRYSGYEPFDY              | 12 | 1.19 |
| mcMBL-15 | PBMC, LC-MBL | IGHV3-30-3 | 100   | IGHD2-21 | IGHJ4 | ARDGRGVVVVTAITPSFDY       | 19 | 1.11 |
| mcMBL-15 | PBMC, LC-MBL | IGHV3-21   | 100   | IGHD3-10 | IGHJ3 | ARDRHEMGIYSGSYYNIGAFDI    | 23 | 0.98 |
| mcMBL-16 | PBMC, LC-MBL | IGHV4-30-4 | 99,66 | IGHD4-17 | IGHJ5 | ASLHDYGLFDP               | 11 | 1.35 |
| mcMBL-16 | PBMC, LC-MBL | IGHV4-34   | 100   | IGHD6-19 | IGHJ4 | ARGRGSSGWYPVPPAGGY        | 18 | 1.26 |
| mcMBL-16 | PBMC, LC-MBL | IGHV4-31   | 100   | IGHD3-10 | IGHJ4 | ARVPYYYGSGSYPPDY          | 16 | 1.25 |
| mcMBL-16 | PBMC, LC-MBL | IGHV3-48   | 100   | IGHD6-13 | IGHJ4 | ARDTGPSSSWFPNYFDY         | 17 | 1.19 |
| mcMBL-16 | PBMC, LC-MBL | IGHV3-66   | 100   | IGHD2-15 | IGHJ6 | ARESVVVG RDGM DV          | 14 | 1.19 |
| mcMBL-16 | PBMC, LC-MBL | IGHV3-21   | 100   | IGHD1-26 | IGHJ4 | ARHRYKWELASFDY            | 14 | 1.09 |
| mcMBL-16 | PBMC, LC-MBL | IGHV4-59   | 99,65 | IGHD5-18 | IGHJ5 | ARDREGTAMGLNWFDP          | 16 | 1.09 |
| mcMBL-16 | PBMC, LC-MBL | IGHV3-30   | 100   | IGHD2-15 | IGHJ4 | AKDREGYC SGGSCYSFDY       | 18 | 1.07 |
| mcMBL-16 | PBMC, LC-MBL | IGHV4-31   | 99,66 | IGHD3-10 | IGHJ6 | ARDPGDAGSFYGM DV          | 15 | 1.07 |
| mcMBL-16 | PBMC, LC-MBL | IGHV4-59   | 100   | IGHD3-9  | IGHJ3 | AREGIRYFDG PSLGAFDI       | 18 | 1.05 |
| mcMBL-16 | PBMC, LC-MBL | IGHV3-23   | 93,06 | IGHD2-21 | IGHJ4 | AKCGGDCYVNSLYGNYSFDH      | 20 | 1.05 |
| mcMBL-16 | PBMC, LC-MBL | IGHV3-33   | 95,67 | IGHD3-22 | IGHJ4 | AGDSSGYPLDY               | 11 | 1.00 |
| mcMBL-16 | PBMC, LC-MBL | IGHV3-9    | 94,88 | IGHD6-13 | IGHJ4 | AKDSRIAVAGFDY             | 13 | 0.99 |

|          |              |            |       |          |       |                       |    |      |
|----------|--------------|------------|-------|----------|-------|-----------------------|----|------|
| mcMBL-16 | PBMC, LC-MBL | IGHV3-15   | 97,61 | IGHD4-17 | IGHJ6 | TTDPTVTTVELLGYYYGMDV  | 20 | 0.99 |
| mcMBL-16 | PBMC, LC-MBL | IGHV4-4    | 92,79 | IGHD6-13 | IGHJ4 | ASDSGSYWRGGY          | 12 | 0.98 |
| mcMBL-16 | PBMC, LC-MBL | IGHV4-31   | 93,55 | IGHD1-26 | IGHJ6 | ARVELLFRGMDV          | 13 | 0.98 |
| mcMBL-16 | PBMC, LC-MBL | IGHV3-11   | 97,34 | IGHD3-22 | IGHJ6 | ARDSTHYYDSRGRGGYYGMDV | 22 | 0.97 |
| mcMBL-16 | PBMC, LC-MBL | IGHV3-30-3 | 93,68 | IGHD3-3  | IGHJ4 | ARGKTVVIDPFGY         | 13 | 0.93 |
| mcMBL-16 | PBMC, LC-MBL | IGHV3-23   | 94,76 | IGHD5-18 | IGHJ4 | ECGMSYGPYCFDY         | 13 | 0.93 |
| mcMBL-17 | PBMC, LC-MBL | IGHV4-34   | 89,82 | IGHD6-19 | IGHJ6 | GAVAAVREYYGMDV        | 14 | 6.29 |
| mcMBL-17 | PBMC, LC-MBL | IGHV3-74   | 99,65 | IGHD2-15 | IGHJ6 | ARVYYYYYMDV           | 11 | 2.24 |
| mcMBL-17 | PBMC, LC-MBL | IGHV3-21   | 100   | IGHD1-26 | IGHJ4 | ARDPYSGSYPDW          | 12 | 1.73 |
| mcMBL-17 | PBMC, LC-MBL | IGHV3-21   | 100   | IGHD2-15 | IGHJ6 | ARADCSGGSCWYGMDV      | 16 | 1.52 |
| mcMBL-17 | PBMC, LC-MBL | IGHV3-11   | 100   | IGHD6-6  | IGHJ5 | AREAEQHRWFDP          | 12 | 1.50 |
| mcMBL-17 | PBMC, LC-MBL | IGHV4-34   | 100   | IGHD6-13 | IGHJ4 | ARGPAIAGYFDY          | 12 | 1.50 |
| mcMBL-17 | PBMC, LC-MBL | IGHV3-9    | 100   | IGHD3-3  | IGHJ6 | AKVYHLDYYYGMDV        | 14 | 1.48 |
| mcMBL-17 | PBMC, LC-MBL | IGHV3-15   | 100   | IGHD7-27 | IGHJ6 | TTSPSYKRGYYYYYMDV     | 16 | 1.47 |
| mcMBL-17 | PBMC, LC-MBL | IGHV3-48   | 95,14 | IGHD3-10 | IGHJ6 | VRDDGGQYFYYGMDV       | 15 | 1.45 |
| mcMBL-17 | PBMC, LC-MBL | IGHV3-33   | 100   | IGHD3-22 | IGHJ4 | AREVGYDSSGYYFYFDY     | 17 | 1.43 |
| mcMBL-17 | PBMC, LC-MBL | IGHV4-31   | 95,53 | IGHD4-17 | IGHJ4 | ARAGDYVDFGY           | 11 | 1.38 |
| mcMBL-17 | PBMC, LC-MBL | IGHV4-4    | 100   | IGHD3-3  | IGHJ6 | ARDWRFLEWLLPSYGMDV    | 18 | 1.35 |
| mcMBL-17 | PBMC, LC-MBL | IGHV3-43   | 96,88 | IGHD6-13 | IGHJ4 | AKELGRRSWSEVDS        | 14 | 1.34 |
| mcMBL-17 | PBMC, LC-MBL | IGHV3-48   | 100   | IGHD3-22 | IGHJ4 | ARDSLTMIVVVVTPFYDY    | 17 | 1.33 |
| mcMBL-17 | PBMC, LC-MBL | IGHV4-59   | 99,65 | IGHD2-8  | IGHJ5 | ARRPMAFRNGWFDP        | 14 | 1.32 |
| mcMBL-17 | PBMC, LC-MBL | IGHV3-21   | 100   | IGHD5-24 | IGHJ5 | ARDRDYNSPLG           | 12 | 1.27 |
| mcMBL-17 | PBMC, LC-MBL | IGHV3-33   | 99,31 | IGHD4-17 | IGHJ4 | ARDGRVYNDYGEIDY       | 15 | 1.24 |
| mcMBL-17 | PBMC, LC-MBL | IGHV4-34   | 100   | IGHD3-3  | IGHJ4 | AIRYYDFWSGSLGY        | 14 | 1.21 |
| mcMBL-17 | PBMC, LC-MBL | IGHV4-59   | 100   | IGHD3-10 | IGHJ4 | ARVALTMVRGAYPGPFDY    | 18 | 1.18 |
| mcMBL-17 | PBMC, LC-MBL | IGHV3-7    | 97,57 | IGHD6-19 | IGHJ4 | AREFGSDWYYFDY         | 13 | 1.15 |
| mcMBL-17 | PBMC, LC-MBL | IGHV3-30   | 100   | IGHD6-13 | IGHJ6 | AKDNQRPEYSSSWYYYYYMDV | 21 | 1.12 |
| mcMBL-17 | PBMC, LC-MBL | IGHV3-15   | 100   | IGHD3-16 | IGHJ4 | TTGVYYDYVWGSYRYTLFDY  | 20 | 1.10 |

|          |              |            |       |          |       |                        |    |      |
|----------|--------------|------------|-------|----------|-------|------------------------|----|------|
| mcMBL-17 | PBMC, LC-MBL | IGHV3-11   | 100   | IGHD2-2  | IGHJ6 | ARSPYQLLGRIHYYYYYGMDV  | 20 | 1.09 |
| mcMBL-17 | PBMC, LC-MBL | IGHV3-48   | 100   | IGHD6-19 | IGHJ6 | ARVGYSSGWGGYYYYMDV     | 18 | 1.05 |
| mcMBL-17 | PBMC, LC-MBL | IGHV3-15   | 95,66 | IGHD3-10 | IGHJ4 | STDRPFSGATTFDY         | 14 | 1.00 |
| mcMBL-17 | PBMC, LC-MBL | IGHV4-39   | 94,63 | IGHD6-19 | IGHJ4 | AREQLVPWYYFDY          | 13 | 0.98 |
| mcMBL-17 | PBMC, LC-MBL | IGHV3-30   | 96,35 | IGHD6-19 | IGHJ4 | AKGARIAVAGMDYFDY       | 16 | 0.97 |
| mcMBL-17 | PBMC, LC-MBL | IGHV3-33   | 94,58 | IGHD3-3  | IGHJ6 | ARALTFGGVIVE           | 12 | 0.96 |
| mcMBL-17 | PBMC, LC-MBL | IGHV4-31   | 98,52 | IGHD3-22 | IGHJ4 | ARVAYYYDSSGYYLFDN      | 18 | 0.95 |
| mcMBL-17 | PBMC, LC-MBL | IGHV3-33   | 97,39 | IGHD2-2  | IGHJ6 | ARDDMRLRGFYYYYYMDV     | 18 | 0.95 |
| mcMBL-17 | PBMC, LC-MBL | IGHV3-9    | 95,31 | IGHD2-15 | IGHJ4 | AKDIGGCGGDCWGSY        | 17 | 0.95 |
| mcMBL-17 | PBMC, LC-MBL | IGHV3-15   | 94,69 | IGHD6-6  | IGHJ4 | ATDSGVGATIGYH          | 13 | 0.93 |
| mcMBL-18 | PBMC, LC-MBL | IGHV3-48   | 97,22 | IGHD3-10 | IGHJ4 | ASTMWVGDRNFDY          | 13 | 1.37 |
| mcMBL-18 | PBMC, LC-MBL | IGHV3-66   | 99,65 | IGHD6-6  | IGHJ6 | ARGPDYYYYYMDV          | 13 | 1.31 |
| mcMBL-18 | PBMC, LC-MBL | IGHV4-39   | 100   | IGHD1-7  | IGHJ5 | ARLPGTP                | 8  | 1.24 |
| mcMBL-18 | PBMC, LC-MBL | IGHV4-31   | 99,66 | IGHD6-6  | IGHJ4 | ARDTHIAARRRYFDY        | 15 | 1.22 |
| mcMBL-18 | PBMC, LC-MBL | IGHV3-7    | 99,65 | IGHD4-17 | IGHJ6 | ARAPTSTVNYYYYYMDV      | 17 | 1.20 |
| mcMBL-18 | PBMC, LC-MBL | IGHV3-7    | 100   | IGHD6-19 | IGHJ4 | ARDTGGWYEGFDY          | 13 | 1.16 |
| mcMBL-18 | PBMC, LC-MBL | IGHV3-21   | 100   | IGHD3-22 | IGHJ6 | ASFIGNYYDSSGTHYYYGMDV  | 21 | 1.13 |
| mcMBL-18 | PBMC, LC-MBL | IGHV3-30-3 | 100   | IGHD6-13 | IGHJ6 | ARAWGQIAAAGMDV         | 14 | 1.11 |
| mcMBL-18 | PBMC, LC-MBL | IGHV3-48   | 99,65 | IGHD5-18 | IGHJ4 | ARVRGYSYGPLDY          | 13 | 1.07 |
| mcMBL-18 | PBMC, LC-MBL | IGHV4-4    | 99,65 | IGHD3-22 | IGHJ4 | ARERYYYDSSGYYTLDY      | 17 | 1.07 |
| mcMBL-18 | PBMC, LC-MBL | IGHV3-48   | 100   | IGHD5-12 | IGHJ4 | ARDGYSGYDPDY           | 12 | 1.02 |
| mcMBL-18 | PBMC, LC-MBL | IGHV4-59   | 93,56 | IGHD6-19 | IGHJ4 | ARHRSSGWSSTLDY         | 14 | 1.00 |
| mcMBL-18 | PBMC, LC-MBL | IGHV4-34   | 96,12 | IGHD6-6  | IGHJ6 | ARVLKPSIAARPLLLYYYYMDV | 22 | 0.99 |
| mcMBL-18 | PBMC, LC-MBL | IGHV3-13   | 94,56 | IGHD3-22 | IGHJ4 | ARGKYYDSSGYYFDY        | 17 | 0.98 |
| mcMBL-18 | PBMC, LC-MBL | IGHV3-30   | 97,66 | IGHD2-2  | IGHJ4 | AKDWAYCSSTSCSPLDY      | 17 | 0.98 |
| mcMBL-18 | PBMC, LC-MBL | IGHV4-31   | 97,16 | IGHD3-3  | IGHJ4 | ARNYYDFWSGYTSTTYFDY    | 20 | 0.97 |
| mcMBL-18 | PBMC, LC-MBL | IGHV4-30-4 | 96,85 | IGHD2-2  | IGHJ6 | AREGHCSSTSCRYGMDV      | 17 | 0.96 |
| mcMBL-18 | PBMC, LC-MBL | IGHV3-15   | 93,25 | IGHD6-6  | IGHJ5 | TTVIDYARVFDY           | 12 | 0.96 |



|          |                         |            |       |          |       |                      |    |      |
|----------|-------------------------|------------|-------|----------|-------|----------------------|----|------|
| mcMBL-18 | PBMC, LC-MBL            | IGHV4-4    | 94,17 | IGHD1-26 | IGHJ4 | AREDSGYDC            | 9  | 0.93 |
| mcMBL-18 | PBMC, LC-MBL            | IGHV4-34   | 97,42 | IGHD2-15 | IGHJ6 | ARAGRVVAAAGTPPNCYMDV | 20 | 0.92 |
| mcMBL-19 | PBMC, LC-MBL            | IGHV1-8    | 95,83 | IGHD4-17 | IGHJ4 | ARGLGADYGDYGAQSDS    | 17 | 6.72 |
| mcMBL-19 | PBMC, LC-MBL            | IGHV3-15   | 100   | IGHD4-17 | IGHJ4 | TTDYGDYPY            | 9  | 1.15 |
| mcMBL-21 | PBMC, LC-MBL            | IGHV3-23   | 95,83 | IGHD3-16 | IGHJ4 | AKNEGVGGIYRLYYFDY    | 17 | 2.48 |
| mcMBL-21 | PBMC, LC-MBL            | IGHV3-7    | 90,62 | IGHD2-15 | IGHJ4 | TTDLGGSSQS           | 10 | 1.44 |
| mcMBL-21 | PBMC, LC-MBL            | IGHV3-11   | 99,65 | IGHD3-22 | IGHJ6 | ARDFLSWSIYYYYGMDV    | 17 | 1.37 |
| mcMBL-22 | PBMC, LC-MBL            | IGHV3-15   | 97,96 | IGHD6-19 | IGHJ4 | TIREGNGWYIY          | 11 | 1.11 |
| mcMBL-23 | PBMC, LC-MBL            | IGHV4-59   | 99,65 | IGHD1-1  | IGHJ6 | ASLDYYYGMDV          | 11 | 1.26 |
| mcMBL-23 | PBMC, LC-MBL            | IGHV3-21   | 97,92 |          | IGHJ3 | ARNDTFDI             | 8  | 1.25 |
| mcMBL-23 | PBMC, LC-MBL            | IGHV3-30   | 100   | IGHD3-10 | IGHJ6 | ARDIKNYGSGSYEDYGMDV  | 20 | 1.21 |
| mcMBL-23 | PBMC, LC-MBL            | IGHV1-8    | 97,57 | IGHD3-3  | IGHJ5 | ARAPRRAGII IKDWFDP   | 17 | 1.20 |
| mcMBL-23 | PBMC, LC-MBL            | IGHV4-39   | 100   | IGHD3-10 | IGHJ6 | ARHLGPYGGQPYYYYGMDV  | 20 | 1.19 |
| mcMBL-23 | PBMC, LC-MBL            | IGHV3-23   | 100   | IGHD6-19 | IGHJ4 | AKDVQWLANFDY         | 12 | 1.11 |
| mcMBL-23 | PBMC, LC-MBL            | IGHV3-23   | 95,49 | IGHD3-10 | IGHJ6 | AKDKRGSASYFDYYGMDV   | 18 | 1.08 |
| mcMBL-23 | PBMC, LC-MBL            | IGHV4-34   | 95,44 | IGHD6-25 | IGHJ4 | ARARMAAPWLGY         | 12 | 1.07 |
| mcMBL-23 | PBMC, LC-MBL            | IGHV3-21   | 95,14 | IGHD6-25 | IGHJ4 | ARGGSDFDY            | 9  | 1.06 |
| mcMBL-23 | PBMC, LC-MBL            | IGHV3-15   | 94,22 | IGHD4-17 | IGHJ4 | TTVPYDYGDSYIDY       | 14 | 1.05 |
| mcMBL-23 | PBMC, LC-MBL            | IGHV3-13   | 91,23 | IGHD6-19 | IGHJ4 | VRGVVRSGWYRYFDF      | 15 | 1.04 |
| mcMBL-23 | PBMC, LC-MBL            | IGHV4-30-2 | 100   | IGHD3-10 | IGHJ5 | AGLNYGSAAFDP         | 12 | 1.03 |
| mcMBL-23 | PBMC, LC-MBL            | IGHV4-59   | 94,66 | IGHD3-10 | IGHJ4 | ARTYGSGSYDY          | 12 | 0.99 |
| mcMBL-23 | PBMC, LC-MBL            | IGHV4-39   | 92,98 | IGHD3-10 | IGHJ4 | VGYGSGSSTLNDY        | 14 | 0.98 |
| mcMBL-23 | PBMC, LC-MBL            | IGHV3-23   | 93,87 | IGHD6-13 | IGHJ5 | AKGGSSWDTYNWFDP      | 15 | 0.95 |
| mcMBL-23 | PBMC, LC-MBL            | IGHV3-74   | 94,12 | IGHD3-22 | IGHJ4 | VREFAASGYDFDT        | 13 | 0.94 |
| bMBL-1   | Normal B cells, LC-MBL  | IGHV1-18   | 89,93 | IGHD4-11 | IGHJ6 | ARGTRVTTSPYYYYMDV    | 17 | 1.13 |
| meB-4    | Memory B cells, Healthy | IGHV4-34   | 96,84 | IGHD2-8  | IGHJ6 | ANSPPTNNIFYMDL       | 14 | 1.77 |
| meB-4    | Memory B cells, Healthy | IGHV3-11   | 94,44 | IGHD4-17 | IGHJ6 | ATTVTGHYYMDV         | 12 | 1.42 |

|       |                         |          |       |          |       |                   |    |      |
|-------|-------------------------|----------|-------|----------|-------|-------------------|----|------|
| meB-4 | Memory B cells, Healthy | IGHV4-61 | 89,69 | IGHD2-15 | IGHJ4 | ARVWRVGVGVTEFDY   | 15 | 1.35 |
| meB-4 | Memory B cells, Healthy | IGHV3-30 | 93,06 | IGHD2-2  | IGHJ4 | ARGGGCSSTTCYLAFDY | 17 | 1.12 |
| meB-4 | Memory B cells, Healthy | IGHV3-73 | 98,98 | IGHD1-20 | IGHJ6 | TQETYNWNYYYYYIDV  | 17 | 1.09 |

**Supplemental Table 4.** List of the IGHV gene repertoire in all sample categories of the present study. Values represent the relative frequency (%) of each individual IGHV gene in each sample category.

|            | MBL cells, LC-MBL | Normal B cells, LC-MBL | Normal B cells, Healthy |
|------------|-------------------|------------------------|-------------------------|
| IGHV1-18   | 4.9               | 3.1                    | 5.9                     |
| IGHV1-2    | 2.4               | 2.3                    | 1.7                     |
| IGHV1-24   | 0.3               | 0.3                    | 1.1                     |
| IGHV1-3    | 1.4               | 1.2                    | 1.5                     |
| IGHV1-45   | 0                 | 0                      | 0                       |
| IGHV1-46   | 0.4               | 0.5                    | 0.7                     |
| IGHV1-58   | 0.2               | 0.3                    | 0.8                     |
| IGHV1-69   | 2.7               | 3.3                    | 3.1                     |
| IGHV1-69-2 | 0                 | 0                      | 0                       |
| IGHV1-8    | 5.2               | 1.3                    | 2.2                     |
| IGHV2-26   | 0.4               | 0.4                    | 4                       |
| IGHV2-5    | 0.8               | 0.8                    | 0.6                     |
| IGHV2-70   | 0.4               | 0.5                    | 2.4                     |
| IGHV2-70D  | 0.1               | 0.2                    | 0.3                     |
| IGHV3-11   | 1.9               | 3.4                    | 3.2                     |
| IGHV3-13   | 0.4               | 0.8                    | 0.3                     |
| IGHV3-15   | 2.8               | 2.4                    | 2.8                     |
| IGHV3-20   | 0.3               | 0.4                    | 0.7                     |
| IGHV3-21   | 6.2               | 4.5                    | 3.8                     |
| IGHV3-23   | 7.4               | 9.2                    | 3.6                     |
| IGHV3-30   | 8.5               | 7.6                    | 3.8                     |
| IGHV3-30-3 | 2.6               | 3.6                    | 0.7                     |
| IGHV3-33   | 3.9               | 4.2                    | 2                       |
| IGHV3-43   | 0.2               | 0.4                    | 0.4                     |
| IGHV3-43D  | 0.1               | 0.1                    | 0.1                     |
| IGHV3-48   | 3.3               | 3.6                    | 3.9                     |
| IGHV3-49   | 0.4               | 0.5                    | 0.8                     |
| IGHV3-53   | 2                 | 1.9                    | 0.9                     |
| IGHV3-64   | 0.2               | 0.3                    | 1                       |
| IGHV3-64D  | 0.1               | 0                      | 0.2                     |
| IGHV3-66   | 1.3               | 1.1                    | 1                       |
| IGHV3-7    | 5.4               | 3.3                    | 2                       |
| IGHV3-72   | 0.4               | 0.3                    | 0.5                     |
| IGHV3-73   | 0.7               | 0.5                    | 1.7                     |
| IGHV3-74   | 2.5               | 2.5                    | 1.2                     |

|            |      |     |      |
|------------|------|-----|------|
| IGHV3-9    | 1.4  | 3.3 | 1.7  |
| IGHV3-NL1  | 0    | 0.1 | 0    |
| IGHV4-28   | 0.2  | 0.1 | 0.1  |
| IGHV4-30-2 | 0.4  | 1   | 1.4  |
| IGHV4-30-4 | 1.2  | 1.7 | 1.3  |
| IGHV4-31   | 2    | 3.3 | 4.6  |
| IGHV4-34   | 10.6 | 6.2 | 13.5 |
| IGHV4-38-2 | 0.7  | 1   | 0.4  |
| IGHV4-39   | 3.3  | 4.8 | 2.6  |
| IGHV4-4    | 2.8  | 3.6 | 3.8  |
| IGHV4-59   | 5.1  | 5.8 | 5.7  |
| IGHV4-61   | 0.8  | 2.1 | 2    |
| IGHV5-10-1 | 0.2  | 0.2 | 0.5  |
| IGHV5-51   | 1.3  | 1.2 | 1.6  |
| IGHV6-1    | 0.4  | 0.3 | 1.6  |
| IGHV7-4-1  | 0.1  | 0.3 | 0.2  |

**Supplemental Table 5.** Post-hoc analysis for multiple comparisons using Bonferroni correction. The Bonferroni corrected p-values of pairwise comparisons between all sample groups for the 12 IGHV genes with significant differences are depicted. These genes were selected after performing ANOVA, separately for all genes, to evaluate overall differences regarding gene expression among groups, and subsequently selecting those genes which maintained statistically significant results after Bonferroni correction.

| IGHV gene | Comparisons between sample categories           |                                                  |                                                       |
|-----------|-------------------------------------------------|--------------------------------------------------|-------------------------------------------------------|
|           | MBL cells, LC-MBL versus normal B cells, LC-MBL | MBL cells, LC-MBL versus normal B cells, Healthy | normal B cells, LC-MBL versus normal B cells, Healthy |
| IGHV3-23  | 0.34                                            | 0.04                                             | 0                                                     |
| IGHV3-30  | 1                                               | 0.001                                            | 0.019                                                 |
| IGHV2-26  | 1                                               | 0                                                | 0                                                     |
| IGHV2-70  | 1                                               | 0                                                | 0                                                     |
| IGHV3-73  | 1                                               | 0                                                | 0                                                     |
| IGHV6-1   | 1                                               | 0                                                | 0                                                     |
| IGHV1-58  | 0.457                                           | 0                                                | 0.002                                                 |
| IGHV3-NL1 | 0.001                                           | 0.998                                            | 0                                                     |
| IGHV1-24  | 1                                               | 0.001                                            | 0.001                                                 |
| IGHV1-45  | 0.095                                           | 0                                                | 0.128                                                 |
| IGHV4-39  | 0.024                                           | 0.385                                            | 0.001                                                 |
| IGHV3-11  | 0.003                                           | 0.004                                            | 1                                                     |

**Supplemental Table 6.** List of the IGHD gene repertoire in all sample categories of the present study. Values represent the relative frequency (%) of each individual IGHD gene in each sample category.

|          | MBL cells. LC-MBL | Normal B cells. LC-MBL | Normal B cells, Healthy |
|----------|-------------------|------------------------|-------------------------|
| IGHD1-1  | 1.8               | 1.5                    | 1.9                     |
| IGHD1-14 | 1                 | 1                      | 1.1                     |
| IGHD1-20 | 0.4               | 0.6                    | 0.5                     |
| IGHD1-26 | 5.1               | 5.8                    | 5.4                     |
| IGHD1-7  | 1.6               | 1                      | 1                       |
| IGHD2-15 | 5.4               | 5.6                    | 5.2                     |
| IGHD2-2  | 7.2               | 6.6                    | 8.5                     |
| IGHD2-21 | 2.7               | 3.5                    | 3.4                     |
| IGHD2-8  | 1.6               | 2                      | 2.2                     |
| IGHD3-10 | 9.5               | 10                     | 10.9                    |
| IGHD3-16 | 3.3               | 4.1                    | 4.1                     |
| IGHD3-22 | 7.9               | 9.1                    | 7.9                     |
| IGHD3-3  | 8.1               | 6.7                    | 8.1                     |
| IGHD3-9  | 2.9               | 2.8                    | 3.6                     |
| IGHD4-11 | 2.6               | 1.9                    | 1.6                     |
| IGHD4-17 | 4.5               | 4.8                    | 3.9                     |
| IGHD4-23 | 2.3               | 2.3                    | 2.2                     |
| IGHD5-12 | 3.3               | 3.3                    | 3.4                     |
| IGHD5-18 | 4.6               | 4                      | 3.9                     |
| IGHD5-24 | 1.8               | 2.6                    | 2.2                     |
| IGHD6-13 | 7.9               | 8                      | 7.6                     |
| IGHD6-19 | 9.2               | 7.2                    | 6.2                     |
| IGHD6-25 | 0.6               | 0.7                    | 0.7                     |
| IGHD6-6  | 3.6               | 3.7                    | 3.2                     |
| IGHD7-27 | 0.7               | 0.8                    | 0.6                     |
| no IGHD  | 0.5               | 0.4                    | 0.4                     |

**Supplemental Table 7.** List of the IGHJ gene repertoire in all sample categories of the present study. Values represent the relative frequency (%) of each individual IGHJ gene in each sample category.

|       | MBL cells, LC-MBL | Normal B cells, LC-MBL | Normal B cells, Healthy |
|-------|-------------------|------------------------|-------------------------|
| IGHJ1 | 2                 | 1.6                    | 1.5                     |
| IGHJ2 | 0.8               | 0.8                    | 0.7                     |
| IGHJ3 | 8.5               | 7.4                    | 7                       |
| IGHJ4 | 47.5              | 45.1                   | 41.1                    |
| IGHJ5 | 11.1              | 12.5                   | 12.6                    |
| IGHJ6 | 30.1              | 32.3                   | 37.1                    |

**Supplemental Table 8.** List of all clusters containing abundant BcR IG clonotypes from the present study.

| Sample ID     | Sample category   | IGHV gene       | SHM status, % | IGHD gene     | IGHJ gene  | CDR3 length | CDR3 sequence      | Cluster        | Frequency, % |
|---------------|-------------------|-----------------|---------------|---------------|------------|-------------|--------------------|----------------|--------------|
| mcMBL-17      | PBMC, LC-MBL      | IGHV4-31*01 F   | 98.52         | IGHD3-22*01 F | IGHJ4*01 F | 18          | ARVAYYYDSSGGYYLFDN | CLUSTER-0-0455 | 0.95         |
| DE-02-0401-H1 | CLL               | IGHV4-30-4*01 F | 100.0         | IGHD3-22*01 F | IGHJ3*02 F | 18          | ARKTYYDSSGGYYDAFDI | CLUSTER-0-0455 |              |
| NY-01-1109-H1 | CLL               | IGHV4-30-4*01 F | 99.66         | IGHD3-22*01 F | IGHJ3*02 F | 18          | ARKTYYDSSGGYYDAFDI | CLUSTER-0-0455 |              |
| MBL-5         | MBL cells, LC-MBL | IGHV1-18*01 F   | 95.83         | IGHD1-14*01 F | IGHJ4*01 F | 9           | ARDRSNKDY          | CLUSTER-0-1211 | 1.84         |
| IT-05-0225-H1 | CLL               | IGHV1-18*04 F   | 96.8          | IGHD6-13*01 F | IGHJ4*02 F | 9           | ARDRSNSDY          | CLUSTER-0-1211 |              |
| mcMBL-23      | PBMC, LC-MBL      | IGHV3-21*01 F   | 97.92         |               | IGHJ3*01 F | 8           | ARNDTFDI           | CLUSTER-0-1292 | 1.25         |
| NY-01-0589-H1 | CLL               | IGHV3-48*01 F   | 98.26         |               | IGHJ3*02 F | 8           | ARDDAFDI           | CLUSTER-0-1292 |              |
| RU-01-0048-H1 | CLL               | IGHV3-53*01 F   | 98.6          |               | IGHJ3*02 F | 8           | ARSDAFDI           | CLUSTER-0-1292 |              |
| MBL-10        | MBL cells, LC-MBL | IGHV4-59*01 F   | 91.58         | IGHD3-22*01 F | IGHJ4*01 F | 14          | ARFTYDSGGHYLQY     | CLUSTER-0-2256 | 4.36         |
| DE-02-0583-H1 | CLL               | IGHV4-34*02 F   | 91.58         | IGHD3-22*01 F | IGHJ4*02 F | 14          | ARGTYDTGGYYIDS     | CLUSTER-0-2256 |              |
| US-01-0069-H1 | CLL               | IGHV4-59*07 F   | 95.32         | IGHD3-22*01 F | IGHJ4*02 F | 14          | ARFSYDSSGGYYLDY    | CLUSTER-0-2256 |              |
| mcMBL-23      | PBMC, LC-MBL      | IGHV3-23*01 F   | 95.49         | IGHD3-10*01 F | IGHJ6*01 F | 18          | AKDKRGSASYFDYYGMDV | CLUSTER-0-2356 | 1.08         |
| DE-02-1174-H1 | CLL               | IGHV3-33*01 F   | 99.54         | IGHD3-10*01 F | IGHJ6*02 F | 18          | ARDQWGSYSYFYYYGMDV | CLUSTER-0-2356 |              |
| NY-01-0511-H1 | CLL               | IGHV3-23*04 F   | 90.28         | IGHD3-10*01 F | IGHJ6*02 F | 18          | AKDPDGSYSYPYYYGMDV | CLUSTER-0-2356 |              |
| mcMBL-15      | PBMC, LC-MBL      | IGHV4-34*01 F   | 100           | IGHD6-25*01 F | IGHJ4*01 F | 12          | ARRRLTQYYFDY       | CLUSTER-0-2983 | 3.28         |
| DK-01-0943-H1 | CLL               | IGHV4-34*01 F   | 96.3          | IGHD4-17*01 F | IGHJ4*02 F | 12          | ARRRTVTYYFDY       | CLUSTER-0-2983 |              |
| mcMBL-18.     | PBMC, LC-MBL      | IGHV3-48*01 F   | 100           | IGHD5-12*01 F | IGHJ4*01 F | 12          | ARDGYSGYDPDY       | CLUSTER-0-3004 | 1.02         |
| IT-01-0294-H1 | CLL               | IGHV3-21*01 F   | 98.96         | IGHD5-12*01 F | IGHJ4*02 F | 12          | ARDGYSYDVDF        | CLUSTER-0-3004 |              |
| mcMBL-16      | PBMC, LC-MBL      | IGHV3-33*01 F   | 95.67         | IGHD3-22*01 F | IGHJ4*01 F | 11          | AGDSSGYPLDY        | CLUSTER-0-3325 | 1            |
| DE-03-2380-H1 | CLL               | IGHV3-7*03 F    | 96.37         | IGHD1-26*01 F | IGHJ4*02 F | 11          | ARDSSGSYLDY        | CLUSTER-0-3325 |              |
| FR-01-0218-H1 | CLL               | IGHV3-33*01 F   | 87.17         | IGHD2-15*01 F | IGHJ4*02 F | 11          | ARDGSGYNLDY        | CLUSTER-0-3325 |              |
| mcMBL-15      | PBMC, LC-MBL      | IGHV3-33*01 F   | 100           | IGHD1-26*01 F | IGHJ4*01 F | 11          | ARDGPHVGFYD        | CLUSTER-0-3359 | 4.16         |
| ES-01-0196-H1 | CLL               | IGHV3-33*01 F   | 98.26         | IGHD3-10*01 F | IGHJ4*02 F | 11          | ARDQTHSGFDY        | CLUSTER-0-3359 |              |
| mcMBL-17      | PBMC, LC-MBL      | IGHV3-43*01 F   | 96.88         | IGHD6-13*01 F | IGHJ4*01 F | 14          | AKELGRRRSWSEVDS    | CLUSTER-0-3714 | 1.34         |
| SE-01-0976-H1 | CLL               | IGHV3-43D*01 F  | 91.32         | IGHD6-13*01 F | IGHJ4*02 F | 14          | AKEYRARSWSSEVDC    | CLUSTER-0-3714 |              |
| MBL-12        | MBL cells, LC-MBL | IGHV3-30-3*01 F | 99.65         | IGHD1-26*01 F | IGHJ4*01 F | 14          | AREGEVGATVATDY     | CLUSTER-0-3719 | 1.45         |
| DK-01-0871-H1 | CLL               | IGHV3-33*01 F   | 93.7          | IGHD1-26*01 F | IGHJ4*02 F | 14          | AREGEVAATGGFDY     | CLUSTER-0-3719 |              |



|               |                   |                 |       |               |            |    |                    |                |      |
|---------------|-------------------|-----------------|-------|---------------|------------|----|--------------------|----------------|------|
| mcMBL-13      | PBMC, LC-MBL      | IGHV4-30-4*01 F | 96.56 | IGHD3-22*01 F | IGHJ6*01 F | 17 | ARDFNYDSSDFYGMVDV  | CLUSTER-0-3819 | 1.11 |
| HU-01-0125-H1 | CLL               | IGHV4-34*01 F   | 97.2  | IGHD3-22*01 F | IGHJ6*02 F | 17 | ARGFNYYDTSGGLGMDV  | CLUSTER-0-3819 |      |
| MBL-10        | MBL cells, LC-MBL | IGHV1-18*01 F   | 97.57 | IGHD6-6*01 F  | IGHJ4*01 F | 9  | ARGEYFDY           | CLUSTER-0-4464 | 1.1  |
| DE-03-3596-H1 | CLL               | IGHV5-51*01 F   | 94.6  | IGHD3-3*01 F  | IGHJ4*02 F | 9  | ARRDYTFDY          | CLUSTER-0-4464 |      |
| mcMBL-14      | PBMC, LC-MBL      | IGHV3-30*01 F   | 94.79 | IGHD4-11*01 F | IGHJ4*01 F | 12 | AKGDSSTSCYDL       | CLUSTER-0-4536 | 0.93 |
| GR-01-1071-H1 | CLL               | IGHV3-53*01 F   | 94.8  | IGHD2-2*01 F  | IGHJ4*02 F | 12 | ARGCSSTSCYLS       | CLUSTER-0-4536 |      |
| mcMBL-23      | PBMC, LC-MBL      | IGHV1-8*01 F    | 97.57 | IGHD3-3*01 F  | IGHJ5*01 F | 17 | ARAPRRAGIIIKDWFDV  | CLUSTER-0-4924 | 1.2  |
| DE-02-1279-H1 | CLL               | IGHV1-8*01 F    | 92.04 | IGHD6-19*01 F | IGHJ5*02 F | 17 | ARAPARTGVTGKSWFDV  | CLUSTER-0-4924 |      |
| mcMBL-18      | PBMC, LC-MBL      | IGHV4-30-4*01 F | 96.85 | IGHD2-2*01 F  | IGHJ6*01 F | 17 | AREGHCSSTSCRYGMDV  | CLUSTER-0-4929 | 0.96 |
| FR-01-0765-H1 | CLL               | IGHV4-34*01 F   | 90.95 | IGHD2-2*01 F  | IGHJ6*02 F | 17 | ARHHICTSTRCPYGMVDV | CLUSTER-0-4929 |      |
| mcMBL-17      | PBMC, LC-MBL      | IGHV3-21*01 F   | 100   | IGHD2-15*01 F | IGHJ6*01 F | 16 | ARADCSGGSCWYGMVDV  | CLUSTER-0-5298 | 1.52 |
| DE-03-4658-H1 | CLL               | IGHV3-30*03 F   | 92.77 | IGHD2-15*01 F | IGHJ6*02 F | 16 | AKWDCSGATCYGLDV    | CLUSTER-0-5298 |      |
| mcMBL-15      | PBMC, LC-MBL      | IGHV4-34*01 F   | 100   | IGHD5-12*01 F | IGHJ4*01 F | 8  | ARGWLQDQ           | CLUSTER-0-5311 | 1.71 |
| IT-01-0352-H1 | CLL               | IGHV4-34*01 F   | 94.9  | IGHD1-26*01 F | IGHJ4*02 F | 8  | ARGWAPDC           | CLUSTER-0-5311 |      |
| mcMBL-16      | PBMC, LC-MBL      | IGHV4-31*01 F   | 99.66 | IGHD3-10*01 F | IGHJ6*01 F | 15 | ARDPGDAGSFYGMVDV   | CLUSTER-0-5436 | 1.07 |
| IT-05-0402-H1 | CLL               | IGHV6-1*01 F    | 97.5  | IGHD6-19*01 F | IGHJ6*02 F | 15 | AREGPVAGTWYGMVDV   | CLUSTER-0-5436 |      |
| mcMBL-17      | PBMC, LC-MBL      | IGHV3-15*01 F   | 95.66 | IGHD3-10*01 F | IGHJ4*01 F | 14 | STDRPFSGATTFDY     | CLUSTER-0-5668 | 1    |
| GR-03-0132-H1 | CLL               | IGHV3-15*01 F   | 92.92 | IGHD3-10*02 F | IGHJ4*02 F | 14 | TTDIPFTMARTFAY     | CLUSTER-0-5668 |      |
| MBL-12        | MBL cells, LC-MBL | IGHV3-30*01 F   | 100   | IGHD6-19*01 F | IGHJ4*01 F | 10 | AKDWSGCLDY         | CLUSTER-1-1678 | 1.42 |
| DE-03-0549-H1 | CLL               | IGHV3-7*02 F    | 91.53 | IGHD6-13*01 F | IGHJ4*02 F | 10 | ARDTSGSLDY         | CLUSTER-1-1678 |      |
| DE-03-2673-H1 | CLL               | IGHV3-30*03 F   | 85.54 | IGHD3-10*01 F | IGHJ4*02 F | 10 | AKDRSWSLDY         | CLUSTER-1-1678 |      |
| DE-03-0447-H1 | CLL               | IGHV3-21*01 F   | 94.78 | IGHD6-13*01 F | IGHJ4*02 F | 10 | ARDLNSLDY          | CLUSTER-1-1678 |      |
| mcMBL-18      | PBMC, LC-MBL      | IGHV4-4*01 F    | 99.65 | IGHD3-22*01 F | IGHJ4*01 F | 17 | ARERYYYDSSGYTLDY   | CLUSTER-1-2173 | 1.07 |
| DE-02-2819-H1 | CLL               | IGHV6-1*01 F    | 100.0 | IGHD3-3*01 F  | IGHJ4*02 F | 17 | ARDRYDFWSGYYVLDY   | CLUSTER-1-2173 |      |
| mcMBL-17      | PBMC, LC-MBL      | IGHV4-34*01 F   | 89.82 | IGHD6-19*01 F | IGHJ6*01 F | 14 | GAVAAVREYYGMDV     | CLUSTER-1-2554 | 6.29 |
| DE-03-2504-H1 | CLL               | IGHV4-39*01 F   | 94.82 | IGHD6-13*01 F | IGHJ6*02 F | 14 | GALAADYYYYGMDV     | CLUSTER-1-2554 |      |
| DK-01-1361-H1 | CLL               | IGHV4-34*01 F   | 96.14 | IGHD6-19*01 F | IGHJ6*02 F | 14 | GAVAADSYYYGMDV     | CLUSTER-1-2554 |      |
| NL-01-0895-H1 | CLL               | IGHV4-34*01 F   | 98.64 | IGHD6-19*01 F | IGHJ6*02 F | 14 | GAVAATYYYYGMDV     | CLUSTER-1-2554 |      |
| NY-01-0556-H1 | CLL               | IGHV4-34*02 F   | 92.63 | IGHD6-13*01 F | IGHJ6*02 F | 14 | VAAAAHYYYGMDV      | CLUSTER-1-2554 |      |
| UK-03-0135-H1 | CLL               | IGHV4-34*02 F   | 96.14 | IGHD2-15*01 F | IGHJ6*02 F | 14 | AAVAATPSYYGMDV     | CLUSTER-1-2554 |      |

|               |                   |               |       |                 |            |    |                           |                |       |
|---------------|-------------------|---------------|-------|-----------------|------------|----|---------------------------|----------------|-------|
| SE-01-0246-H1 | CLL               | IGHV4-34*01 F | 98.32 | IGHD2-15*01 F   | IGHJ6*01 F | 14 | GVVAATRDRYYGMDV           | CLUSTER-1-2554 |       |
| MBL-12        | MBL cells, LC-MBL | IGHV3-72*01 F | 87.76 | IGHD1-1*01 F    | IGHJ4*01 F | 10 | VRENWYRFDY                | CLUSTER-1-2625 | 2.18  |
| DE-02-2156-H1 | CLL               | IGHV3-48*01 F | 90.28 | IGHD7-27*01 F   | IGHJ4*02 F | 10 | ARENWGRFDY                | CLUSTER-1-2625 |       |
| DK-01-0988-H1 | CLL               | IGHV3-66*01 F | 92.98 | IGHD2-8*02 F    | IGHJ4*02 F | 10 | ARWAWKRFDY                | CLUSTER-1-2625 |       |
| DE-02-2433-H1 | CLL               | IGHV3-72*01 F | 92.47 | IGHD7-27*01 F   | IGHJ4*02 F | 10 | ARDNWGSFDC                | CLUSTER-1-2625 |       |
| DK-01-1182-H1 | CLL               | IGHV3-7*03 F  | 93.75 | IGHD5-12*01 F   | IGHJ4*02 F | 10 | ARENWGPDP                 | CLUSTER-1-2625 |       |
| MBL-1         | MBL cells, LC-MBL | IGHV1-3*01 F  | 90.28 | IGHD5-18*01 F   | IGHJ3*01 F | 17 | ARGIRVGYDYGYDVFDI         | CLUSTER-1-3235 | 86.28 |
| DK-01-0530-H1 | CLL               | IGHV1-3*01 F  | 92.01 | IGHD2-21*02 F   | IGHJ3*02 F | 17 | ARGIRVGTRYGDDAFDI         | CLUSTER-1-3235 |       |
| NY-01-0172-H1 | CLL               | IGHV1-3*01 F  | 92.71 | IGHD4-17*01 F   | IGHJ3*01 F | 17 | ARGIRVGTAYGDDAFNF         | CLUSTER-1-3235 |       |
| PL-01-0139-H1 | CLL               | IGHV1-3*01 F  | 91.84 | IGHD5-18*01 F   | IGHJ3*02 F | 17 | VRGVRGGYDYGEDAFDI         | CLUSTER-1-3235 |       |
| US-01-0041-H1 | CLL               | IGHV1-3*01 F  | 93.31 | IGHD1-26*01 F   | IGHJ3*02 F | 17 | ARGVRTGTYYGDDAFDI         | CLUSTER-1-3235 |       |
| DE-03-1861-H1 | CLL               | IGHV1-3*01 F  | 88.98 | IGHD1-26*01 F   | IGHJ3*01 F | 17 | ARGLRSGWYYGDDAFEV         | CLUSTER-1-3235 |       |
| RU-01-0272-H1 | CLL               | IGHV1-3*01 F  | 92.01 | IGHD5-18*01 F   | IGHJ3*01 F | 17 | ARGLRSGYTYGDDAFDF         | CLUSTER-1-3235 |       |
| mcMBL-14      | PBMC, LC-MBL      | IGHV3-74*01 F | 93.45 |                 | IGHJ6*01 F | 5  | ARERV                     | CLUSTER-1-3237 | 0.95  |
| FR-01-1168-H1 | CLL               | IGHV3-7*03 F  | 92.71 | IGHD1-14*01 ORF | IGHJ1*01 F | 5  | ARDRS                     | CLUSTER-1-3237 |       |
| DE-02-1411-H1 | CLL               | IGHV3-7*01 F  | 90.82 |                 | IGHJ4*01 F | 5  | ARDKD                     | CLUSTER-1-3237 |       |
| MBL-5         | MBL cells, LC-MBL | IGHV3-7*01 F  | 89.24 | IGHD6-19*01 F   | IGHJ4*01 F | 10 | ACGGGWLVDS                | CLUSTER-1-3314 | 12.53 |
| GR-01-0176-H2 | CLL               | IGHV3-7*01 F  | 93.75 | IGHD5-24*01 ORF | IGHJ6*02 F | 10 | AKGGGGHMDV                | CLUSTER-1-3314 |       |
| GR-03-0274-H1 | CLL               | IGHV3-7*01 F  | 90.5  | IGHD2-21*02 F   | IGHJ6*02 F | 10 | AKGGGWDLDV                | CLUSTER-1-3314 |       |
| DE-03-4511-H1 | CLL               | IGHV3-7*01 F  | 91.2  | IGHD2-21*01 F   | IGHJ4*02 F | 10 | ASGSGWLVD                 | CLUSTER-1-3314 |       |
| mcMBL-15      | PBMC, LC-MBL      | IGHV3-64*01 F | 100   | IGHD6-19*01 F   | IGHJ4*01 F | 14 | ARGRNIAVAGLLGY            | CLUSTER-1-3483 | 4.09  |
| DE-03-2906-H1 | CLL               | IGHV3-23*01 F | 96.27 | IGHD6-13*01 F   | IGHJ4*02 F | 14 | AKGDNIAAAGHFYY            | CLUSTER-1-3483 |       |
| UK-01-0168-H1 | CLL               | IGHV3-13*01 F | 96.14 | IGHD6-19*01 F   | IGHJ4*02 F | 14 | ARGANGAVAGTFDY            | CLUSTER-1-3483 |       |
| mcMBL-17      | PBMC, LC-MBL      | IGHV3-74*01 F | 99.65 | IGHD2-15*01 F   | IGHJ6*01 F | 11 | ARVYYYYMDV                | CLUSTER-1-3561 | 2.24  |
| DE-03-1379-H1 | CLL               | IGHV3-11*01 F | 95.98 |                 | IGHJ6*02 F | 11 | ARRSYYYAMDI               | CLUSTER-1-3561 |       |
| IT-06-0257-H1 | CLL               | IGHV3-30*03 F | 94.79 | IGHD3-10*01 F   | IGHJ6*02 F | 11 | VTRDYYYGMDV               | CLUSTER-1-3561 |       |
| SE-01-0655-H1 | CLL               | IGHV3-48*03 F | 94.09 | IGHD6-13*01 F   | IGHJ6*02 F | 11 | AGRPLYYGMDV               | CLUSTER-1-3561 |       |
| mcMBL-15      | PBMC, LC-MBL      | IGHV4-61*01 F | 100   | IGHD3-22*01 F   | IGHJ6*01 F | 26 | ARGTRTYYYDSSGYSPWYYYYGMDV | CLUSTER-2-0082 | 1.71  |
| RU-01-0667-H1 | CLL               | IGHV4-31*03 F | 100.0 | IGHD3-22*01 F   | IGHJ6*02 F | 26 | ARGLRGDYDSSGYVGYYYYYGMDV  | CLUSTER-2-0082 |       |
| IT-02-0123-H1 | CLL               | IGHV4-34*01 F | 100.0 | IGHD3-22*01 F   | IGHJ6*03 F | 26 | ARGLRGPYDSSGYTWNYYYYYMDV  | CLUSTER-2-0082 |       |

|               |                   |                 |       |               |            |    |                             |                |      |
|---------------|-------------------|-----------------|-------|---------------|------------|----|-----------------------------|----------------|------|
| DE-02-2934-H1 | CLL               | IGHV4-59*01 F   | 100.0 | IGHD3-22*01 F | IGHJ6*02 F | 26 | ARGIQGYYYDSSGYYYHDTYYYYGMDV | CLUSTER-2-0082 |      |
| DE-02-4439-H1 | CLL               | IGHV4-61*01 F   | 100.0 | IGHD3-22*01 F | IGHJ6*02 F | 26 | ARVGGGEYYDSSGYYYVGYYYYYGMDV | CLUSTER-2-0082 |      |
| DE-03-3121-H1 | CLL               | IGHV4-59*01 F   | 100.0 | IGHD3-22*01 F | IGHJ6*02 F | 26 | ARAPGGDYDSSGYYYVGYYYYYGMDV  | CLUSTER-2-0082 |      |
| DE-03-3300-H1 | CLL               | IGHV4-59*01 F   | 100.0 | IGHD3-22*01 F | IGHJ6*02 F | 26 | ARANGGDYDSSGYYYVGYYYYYGMDV  | CLUSTER-2-0082 |      |
| ES-01-0208-H1 | CLL               | IGHV4-59*01 F   | 100.0 | IGHD3-22*01 F | IGHJ6*02 F | 26 | ARARGLNYDSSGYYYLNYYYYGMDV   | CLUSTER-2-0082 |      |
| GR-02-0278-H1 | CLL               | IGHV4-59*01 F   | 100.0 | IGHD3-22*01 F | IGHJ6*02 F | 26 | ARAPGPDYDSSGYYYVGYYYYYGMDV  | CLUSTER-2-0082 |      |
| IT-02-0370-H1 | CLL               | IGHV4-59*01 F   | 100.0 | IGHD3-22*01 F | IGHJ6*02 F | 26 | ARCIGGDYDSSGYYYVSYYYYYGMDV  | CLUSTER-2-0082 |      |
| CZ-01-0087-H1 | CLL               | IGHV4-61*01 F   | 100.0 | IGHD3-22*01 F | IGHJ6*02 F | 26 | ARAVSGDYDSSGYYYVGYYYYYGMDV  | CLUSTER-2-0082 |      |
| CZ-01-1602-H1 | CLL               | IGHV4-30-4*01 F | 100.0 | IGHD3-22*01 F | IGHJ6*02 F | 26 | ARVKRGDYDSSGYYYVGYYYYYGMDV  | CLUSTER-2-0082 |      |
| DE-02-2982-H1 | CLL               | IGHV4-30-4*01 F | 100.0 | IGHD3-22*01 F | IGHJ6*02 F | 26 | ARALRGDYDSSGYYYVGYYYYYGMDV  | CLUSTER-2-0082 |      |
| DE-02-4310-H1 | CLL               | IGHV4-39*01 F   | 100.0 | IGHD3-22*01 F | IGHJ6*02 F | 26 | ARHASGDYDSSGYYYVQFYYYGMDV   | CLUSTER-2-0082 |      |
| DE-03-1212-H1 | CLL               | IGHV4-38-2*01 F | 100.0 | IGHD3-22*01 F | IGHJ6*02 F | 26 | ARGGEGDYDSSGYYYVWYYYYGMDV   | CLUSTER-2-0082 |      |
| DE-03-3496-H1 | CLL               | IGHV4-59*01 F   | 100.0 | IGHD3-22*01 F | IGHJ6*02 F | 26 | ARDQRGDYDSSGYYYVGYYYYYGMDV  | CLUSTER-2-0082 |      |
| PL-01-0030-H1 | CLL               | IGHV4-38-2*01 F | 100.0 | IGHD3-22*01 F | IGHJ6*02 F | 26 | ARQVDGDYDSSGYYYIYYYYGMDV    | CLUSTER-2-0082 |      |
| RU-01-0084-H1 | CLL               | IGHV4-59*01 F   | 99.65 | IGHD3-22*01 F | IGHJ6*02 F | 26 | ARAIKGDYDSSGYYSLGYYYYGMDV   | CLUSTER-2-0082 |      |
| RU-01-0531-H1 | CLL               | IGHV4-59*08 F   | 96.08 | IGHD3-22*01 F | IGHJ6*03 F | 26 | GRNLRGDYDSSGYYFVGFYYYYMDV   | CLUSTER-2-0082 |      |
| DE-02-3741-H1 | CLL               | IGHV4-61*01 F   | 100.0 | IGHD3-22*01 F | IGHJ6*01 F | 26 | ARDPHGGYDSSGYYYVDYYYYGMDV   | CLUSTER-2-0082 |      |
| PL-01-0284-H1 | CLL               | IGHV4-59*01 F   | 100.0 | IGHD3-22*01 F | IGHJ6*02 F | 26 | ARSGPSDYDSSGYYYVGYYYYYGMDV  | CLUSTER-2-0082 |      |
| US-01-1222-H1 | CLL               | IGHV4-59*01 F   | 100.0 | IGHD3-22*01 F | IGHJ6*02 F | 26 | ARSLGSDYDSSGYYYVLYYYYYGMDV  | CLUSTER-2-0082 |      |
| mcMBL-23      | PBMC, LC-MBL      | IGHV4-59*01 F   | 94.66 | IGHD3-10*01 F | IGHJ4*01 F | 12 | ARTYGSGSYYDY                | CLUSTER-2-0088 | 0.99 |
| DE-03-4177-H1 | CLL               | IGHV4-59*01 F   | 93.33 | IGHD6-6*01 F  | IGHJ4*02 F | 12 | ARTYGS SFYFDY               | CLUSTER-2-0088 |      |
| NY-01-0158-H1 | CLL               | IGHV4-4*02 F    | 93.06 | IGHD1-26*01 F | IGHJ4*02 F | 12 | ARTIGSGSYLDH                | CLUSTER-2-0088 |      |
| IT-02-0740-H1 | CLL               | IGHV4-34*01 F   | 95.44 | IGHD3-10*01 F | IGHJ4*02 F | 12 | ARAYGS SYLFY                | CLUSTER-2-0088 |      |
| DE-03-4476-H1 | CLL               | IGHV4-31*03 F   | 94.85 | IGHD3-10*01 F | IGHJ4*02 F | 12 | ACAYGS SYVDF                | CLUSTER-2-0088 |      |
| MBL-12        | MBL cells, LC-MBL | IGHV4-34*01 F   | 96.49 | IGHD2-2*01 F  | IGHJ4*01 F | 16 | ARGGGYCSSTSCYHDY            | CLUSTER-2-0128 | 1.57 |
| CZ-01-0692-H1 | CLL               | IGHV4-34*01 F   | 93.33 | IGHD2-2*01 F  | IGHJ4*02 F | 16 | ARGGGYCSGTSCYEDS            | CLUSTER-2-0128 |      |
| DK-01-0764-H1 | CLL               | IGHV4-34*01 F   | 96.84 | IGHD2-2*02 F  | IGHJ4*02 F | 16 | ARGGGYCSGTSCYTDY            | CLUSTER-2-0128 |      |
| UK-03-0178-H1 | CLL               | IGHV4-34*01 F   | 94.04 | IGHD2-15*01 F | IGHJ4*02 F | 16 | ARGGGYCSGGSCYEDY            | CLUSTER-2-0128 |      |
| AT-01-0145-H2 | CLL               | IGHV4-34*02 F   | 97.54 | IGHD2-2*01 F  | IGHJ4*02 F | 16 | ARGGGYCSSPSCFPDY            | CLUSTER-2-0128 |      |
| DE-03-4878-H1 | CLL               | IGHV4-34*01 F   | 89.8  | IGHD2-8*02 F  | IGHJ4*02 F | 16 | ARGGGYCISSCYIDN             | CLUSTER-2-0128 |      |

|               |                   |               |       |               |            |    |                      |                |      |
|---------------|-------------------|---------------|-------|---------------|------------|----|----------------------|----------------|------|
| DK-01-0693-H1 | CLL               | IGHV4-34*01 F | 97.89 | IGHD2-2*01 F  | IGHJ4*02 F | 16 | ARGGGYCRSSSCYVDF     | CLUSTER-2-0128 |      |
| GR-01-0038-H1 | CLL               | IGHV4-34*08 F | 93.1  | IGHD2-2*01 F  | IGHJ4*01 F | 16 | ARGGGYCGSSSCYVDY     | CLUSTER-2-0128 |      |
| IT-07-0402-H1 | CLL               | IGHV4-34*01 F | 92.28 | IGHD2-2*01 F  | IGHJ4*01 F | 16 | ARGGGYCGVTSCYDDF     | CLUSTER-2-0128 |      |
| GR-03-0350-H1 | CLL               | IGHV4-34*01 F | 92.83 | IGHD2-15*01 F | IGHJ4*02 F | 16 | ARGLRYCAGGSCYLDL     | CLUSTER-2-0128 |      |
| mcMBL-16      | PBMC, LC-MBL      | IGHV3-30*01 F | 100   | IGHD2-15*01 F | IGHJ4*01 F | 18 | AKDREGYCSGGSCYSFDY   | CLUSTER-2-0447 | 1.07 |
| CZ-01-0167-H1 | CLL               | IGHV3-74*01 F | 93.06 | IGHD2-15*01 F | IGHJ4*02 F | 18 | ARGVPGPGCGGGSCYFFDC  | CLUSTER-2-0447 |      |
| DK-01-1015-H1 | CLL               | IGHV3-74*01 F | 94.44 | IGHD2-15*01 F | IGHJ4*02 F | 18 | ARGVRGYCGGGSCYFFDY   | CLUSTER-2-0447 |      |
| SE-01-1077-H1 | CLL               | IGHV3-74*01 F | 96.34 | IGHD2-15*01 F | IGHJ4*02 F | 18 | ARGVPGYCSGGSCYFFDD   | CLUSTER-2-0447 |      |
| NY-01-0053-H1 | CLL               | IGHV3-74*01 F | 97.57 | IGHD3-22*01 F | IGHJ4*02 F | 18 | ARGAPGYDRSGSLYYFDY   | CLUSTER-2-0447 |      |
| FR-01-0759-H1 | CLL               | IGHV3-30*03 F | 98.2  | IGHD2-15*01 F | IGHJ4*02 F | 18 | AKDNKEGYCSGGSCYSYD   | CLUSTER-2-0447 |      |
| MBL-2         | MBL cells, LC-MBL | IGHV3-30*01 F | 93.4  | IGHD2-2*01 F  | IGHJ4*01 F | 14 | AKDHGSTSWYYLDY       | CLUSTER-2-0482 | 69.1 |
| DE-02-1696-H1 | CLL               | IGHV3-23*01 F | 92.75 | IGHD6-19*01 F | IGHJ4*02 F | 14 | AKDLGSSGWYYFDY       | CLUSTER-2-0482 |      |
| DE-03-1982-H1 | CLL               | IGHV3-74*03 F | 93.98 | IGHD6-13*01 F | IGHJ4*02 F | 14 | ARESYSSTWYGPI        | CLUSTER-2-0482 |      |
| HU-01-0172-H1 | CLL               | IGHV3-74*01 F | 89.8  | IGHD6-13*01 F | IGHJ2*01 F | 14 | ARESYSDDWYGPK        | CLUSTER-2-0482 |      |
| IT-05-0152-H1 | CLL               | IGHV3-74*01 F | 95.47 | IGHD6-13*01 F | IGHJ4*02 F | 14 | AREAYSSTWYGPDH       | CLUSTER-2-0482 |      |
| DE-02-1832-H1 | CLL               | IGHV3-23*01 F | 93.98 | IGHD6-6*01 F  | IGHJ6*02 F | 14 | AKEGGSSSWYGIDV       | CLUSTER-2-0482 |      |
| mcMBL-17      | PBMC, LC-MBL      | IGHV3-11*01 F | 100   | IGHD2-2*01 F  | IGHJ6*01 F | 20 | ARSPYQLLGRIHYYYYGMDV | CLUSTER-2-0501 | 1.09 |
| DE-01-0024-H1 | CLL               | IGHV3-30*03 F | 100.0 | IGHD2-2*02 F  | IGHJ6*02 F | 20 | AKDLYQLLYPNRYYYGMDV  | CLUSTER-2-0501 |      |
| RU-01-0152-H1 | CLL               | IGHV3-9*01 F  | 100.0 | IGHD2-2*02 F  | IGHJ6*02 F | 20 | AKDRQLLLYPSYYYYGMDV  | CLUSTER-2-0501 |      |
| DE-02-3511-H1 | CLL               | IGHV3-48*03 F | 100.0 | IGHD1-26*01 F | IGHJ6*03 F | 20 | ARSAWELLLRVYYYYYMDV  | CLUSTER-2-0501 |      |
| mcMBL-17      | PBMC, LC-MBL      | IGHV3-33*01 F | 100   | IGHD3-22*01 F | IGHJ4*01 F | 17 | AREVGYDSSGYYFFDY     | CLUSTER-2-0525 | 1.43 |
| mcMBL-18      | PBMC, LC-MBL      | IGHV3-13*01 F | 94.56 | IGHD3-22*01 F | IGHJ4*01 F | 17 | ARGKYYDSSGYYFFDY     | CLUSTER-2-0525 | 0.98 |
| DE-03-2760-H1 | CLL               | IGHV3-74*01 F | 92.11 | IGHD3-22*01 F | IGHJ4*02 F | 17 | ARVRYDSSGGYRDFDY     | CLUSTER-2-0525 |      |
| GR-01-0317-H1 | CLL               | IGHV3-7*03 F  | 95.14 | IGHD3-22*01 F | IGHJ4*02 F | 17 | ARGRYDSSGFYHYFDY     | CLUSTER-2-0525 |      |
| DE-03-2559-H1 | CLL               | IGHV3-74*03 F | 93.95 | IGHD3-22*01 F | IGHJ4*02 F | 17 | AKMNYDSSGFYGFDS      | CLUSTER-2-0525 |      |
| ES-01-0331-H1 | CLL               | IGHV3-33*01 F | 100.0 | IGHD3-22*01 F | IGHJ6*02 F | 17 | ARTYYDSSGRYYGMDV     | CLUSTER-2-0525 |      |
| DE-02-4371-H1 | CLL               | IGHV3-33*01 F | 95.17 | IGHD3-22*01 F | IGHJ4*02 F | 17 | ARASYYDSSGGYYPIDY    | CLUSTER-2-0525 |      |
| mcMBL-21      | PBMC, LC-MBL      | IGHV3-7*01 F  | 90.62 | IGHD2-15*01 F | IGHJ4*01 F | 10 | TTDLGGSSQS           | CLUSTER-2-0601 | 1.44 |
| CZ-01-1332-H1 | CLL               | IGHV3-72*01 F | 92.86 | IGHD4-17*01 F | IGHJ5*01 F | 10 | TTDAQGSPDS           | CLUSTER-2-0601 |      |
| DE-03-3473-H1 | CLL               | IGHV3-15*01 F | 93.04 | IGHD2-21*02 F | IGHJ4*02 F | 10 | STDKQLSPDY           | CLUSTER-2-0601 |      |

|               |                         |               |       |                 |            |    |                    |                |       |
|---------------|-------------------------|---------------|-------|-----------------|------------|----|--------------------|----------------|-------|
| DE-02-0695-H1 | CLL                     | IGHV3-15*01 F | 93.43 | IGHD3-16*02 F   | IGHJ4*02 F | 10 | TTDKQLSADY         | CLUSTER-2-0601 |       |
| MBL-3         | MBL cells, LC-MBL       | IGHV1-8*01 F  | 95.83 | IGHD6-13*01 F   | IGHJ4*01 F | 10 | ARGLADNTDY         | CLUSTER-2-0602 | 97.55 |
| GR-02-0114-H1 | CLL                     | IGHV1-8*01 F  | 92.71 | IGHD2-15*01 F   | IGHJ4*01 F | 10 | ARGLADSRDY         | CLUSTER-2-0602 |       |
| GR-03-0096-H1 | CLL                     | IGHV1-8*01 F  | 95.1  | IGHD4-23*01 ORF | IGHJ4*02 F | 10 | ARGLDGGRDY         | CLUSTER-2-0602 |       |
| DE-02-4772-H2 | CLL                     | IGHV1-8*01 F  | 96.53 | IGHD3-16*01 F   | IGHJ5*02 F | 10 | ARGLGEGGDA         | CLUSTER-2-0602 |       |
| GR-02-0075-H1 | CLL                     | IGHV1-8*01 F  | 96.84 | IGHD4-17*01 F   | IGHJ4*03 F | 10 | ARGLGVDGDS         | CLUSTER-2-0602 |       |
| GR-02-0550-H1 | CLL                     | IGHV1-8*01 F  | 95.83 | IGHD3-10*01 F   | IGHJ4*02 F | 10 | ARGLAEGGDS         | CLUSTER-2-0602 |       |
| US-01-0922-H1 | CLL                     | IGHV1-46*01 F | 92.34 | IGHD4-23*01 ORF | IGHJ4*02 F | 10 | ARGIDENADY         | CLUSTER-2-0602 |       |
| IT-07-0239-H1 | CLL                     | IGHV1-8*01 F  | 95.14 | IGHD4-17*01 F   | IGHJ4*02 F | 10 | ARGLDDHGDG         | CLUSTER-2-0602 |       |
| CZ-01-1879-H1 | CLL                     | IGHV1-8*01 F  | 96.18 | IGHD2-21*02 F   | IGHJ4*02 F | 10 | ARGLEGDHDC         | CLUSTER-2-0602 |       |
| GR-02-0009-H1 | CLL                     | IGHV1-2*02 F  | 100.0 | IGHD2-2*01 F    | IGHJ6*01 F | 10 | ARGQAYGMDV         | CLUSTER-2-0602 |       |
| UK-01-0417-H1 | CLL                     | IGHV1-3*01 F  | 89.58 |                 | IGHJ6*02 F | 10 | ARDNYYGMDV         | CLUSTER-2-0602 |       |
| mcMBL-15      | PBMC, LC-MBL            | IGHV4-31*01 F | 100   | IGHD3-22*01 F   | IGHJ6*01 F | 17 | ARAVYDSSGYFYYGMDV  | CLUSTER-2-0604 | 2.93  |
| US-01-1142-H1 | CLL                     | IGHV4-59*07 F | 100.0 | IGHD3-22*01 F   | IGHJ6*02 F | 17 | ARDPADSSGWNYYGMDV  | CLUSTER-2-0604 |       |
| mcMBL-17      | PBMC, LC-MBL            | IGHV3-9*01 F  | 100   | IGHD3-3*01 F    | IGHJ6*01 F | 14 | AKVYHLDYYYGMDV     | CLUSTER-2-0617 | 1.48  |
| IT-02-0347-H1 | CLL                     | IGHV3-30*02 F | 89.24 | IGHD1-1*01 F    | IGHJ6*03 F | 14 | AKGPHLDYYYMEV      | CLUSTER-2-0617 |       |
| DK-01-0245-H1 | CLL                     | IGHV3-21*01 F | 90.97 | IGHD2-8*01 F    | IGHJ6*03 F | 14 | ARGPYADSYYYMDV     | CLUSTER-2-0617 |       |
| meB-4         | Memory B cells, Healthy | IGHV3-30*01 F | 93.06 | IGHD2-2*01 F    | IGHJ4*01 F | 17 | ARGGGCSSTTCYLAFDY  | CLUSTER-3-0104 | 1.12  |
| CZ-01-0459-H1 | CLL                     | IGHV3-72*01 F | 97.62 | IGHD2-2*01 F    | IGHJ4*02 F | 17 | ARVRYCSSTSCRGALDY  | CLUSTER-3-0104 |       |
| GR-02-0620-H1 | CLL                     | IGHV3-23*01 F | 95.83 | IGHD2-2*02 F    | IGHJ4*02 F | 17 | AKDRHCSSTSCHTGFDY  | CLUSTER-3-0104 |       |
| DE-03-4880-H1 | CLL                     | IGHV3-72*01 F | 96.06 | IGHD2-2*01 F    | IGHJ3*02 F | 17 | ARVGYCSSTTCRQAFDI  | CLUSTER-3-0104 |       |
| NL-01-1271-H1 | CLL                     | IGHV3-21*01 F | 95.52 | IGHD2-2*01 F    | IGHJ5*02 F | 17 | ARGAYCSSTSCYDWFDP  | CLUSTER-3-0104 |       |
| NL-04-0117-H1 | CLL                     | IGHV3-72*01 F | 98.3  | IGHD2-2*03 F    | IGHJ3*02 F | 17 | ARVAYCSSTTCRQAFDI  | CLUSTER-3-0104 |       |
| FR-01-0240-H1 | CLL                     | IGHV3-23*01 F | 92.83 | IGHD2-2*03 F    | IGHJ4*02 F | 17 | AKSEYCSSTSCYASFDH  | CLUSTER-3-0104 |       |
| UK-01-0565-H1 | CLL                     | IGHV3-74*01 F | 95.88 | IGHD2-2*01 F    | IGHJ4*01 F | 17 | ARALDCSSTSCYRHFDN  | CLUSTER-3-0104 |       |
| MBL-7         | MBL cells, LC-MBL       | IGHV2-5*01 F  | 93.47 | IGHD2-2*01 F    | IGHJ5*01 F | 17 | ANRRQYNTNWDAGWFDP  | CLUSTER-4-0003 | 97.15 |
| IT-01-0034-H1 | CLL                     | IGHV2-5*02 F  | 95.19 | IGHD1-7*01 F    | IGHJ4*02 F | 17 | AHRLHLQRDWNYYGRFDY | CLUSTER-4-0003 |       |
| IT-05-0052-H1 | CLL                     | IGHV2-5*02 F  | 95.88 | IGHD1-7*01 F    | IGHJ4*02 F | 17 | AHRLIGRRDWNYYGTFDY | CLUSTER-4-0003 |       |
| PL-01-0313-H1 | CLL                     | IGHV2-5*02 F  | 92.63 | IGHD1-7*01 F    | IGHJ4*02 F | 17 | AHRLTLQGDWNYYGDFDY | CLUSTER-4-0003 |       |
| UK-01-0273-H1 | CLL                     | IGHV2-5*02 F  | 93.47 | IGHD1-7*01 F    | IGHJ4*02 F | 17 | AHRRFLHGDWNYYGDFDY | CLUSTER-4-0003 |       |

|               |     |              |       |                 |            |    |                    |                |
|---------------|-----|--------------|-------|-----------------|------------|----|--------------------|----------------|
| US-01-0620-H1 | CLL | IGHV2-5*02 F | 93.73 | IGHD1-7*01 F    | IGHJ4*02 F | 17 | AHRRLISGNWNYGDFDY  | CLUSTER-4-0003 |
| CZ-01-0909-H1 | CLL | IGHV2-5*02 F | 94.85 | IGHD1-7*01 F    | IGHJ4*02 F | 17 | AHRQWLMSDWNFGYFDY  | CLUSTER-4-0003 |
| DE-02-0147-H1 | CLL | IGHV2-5*02 F | 97.41 | IGHD6-19*01 F   | IGHJ4*02 F | 17 | AHRLIKMSDWNCGYFDY  | CLUSTER-4-0003 |
| NL-04-0025-H1 | CLL | IGHV2-5*02 F | 91.41 | IGHD2-21*02 F   | IGHJ4*02 F | 17 | AHRRALASDWNFGYFDY  | CLUSTER-4-0003 |
| NL-01-0695-H1 | CLL | IGHV2-5*02 F | 89.16 | IGHD3-3*01 F    | IGHJ4*02 F | 17 | ARRRERFSQWLSGDFDY  | CLUSTER-4-0003 |
| US-01-1360-H1 | CLL | IGHV2-5*02 F | 91.75 | IGHD3-9*01 F    | IGHJ4*02 F | 17 | AHRRFRYSDWVSGDFDY  | CLUSTER-4-0003 |
| CZ-01-1652-H1 | CLL | IGHV2-5*02 F | 94.85 | IGHD1-1*01 F    | IGHJ4*02 F | 17 | AHRLRGRDIWNDGDFDY  | CLUSTER-4-0003 |
| DK-01-0206-H1 | CLL | IGHV2-5*02 F | 93.13 | IGHD1-7*01 F    | IGHJ4*02 F | 17 | AHRRRGPDWNYGDFDY   | CLUSTER-4-0003 |
| DE-03-3016-H1 | CLL | IGHV2-5*02 F | 95.88 | IGHD4-17*01 F   | IGHJ4*02 F | 17 | AHRLATGSPWPWGYFDY  | CLUSTER-4-0003 |
| NL-01-1260-H1 | CLL | IGHV2-5*02 F | 91.41 | IGHD3-10*01 F   | IGHJ4*02 F | 17 | AHRLRMGAPWSWGTFDY  | CLUSTER-4-0003 |
| UK-01-0013-H1 | CLL | IGHV2-5*02 F | 92.34 | IGHD1-26*01 F   | IGHJ4*02 F | 17 | AHRLATGSPWTWGYFDY  | CLUSTER-4-0003 |
| US-01-1139-H1 | CLL | IGHV2-5*02 F | 94.12 | IGHD4-23*01 ORF | IGHJ4*02 F | 17 | AHRLALGPPWTWGYFDY  | CLUSTER-4-0003 |
| IT-02-0220-H1 | CLL | IGHV2-5*02 F | 92.78 | IGHD1-1*01 F    | IGHJ4*02 F | 17 | GHRVITGSPWDGGFFDY  | CLUSTER-4-0003 |
| DE-03-2774-H1 | CLL | IGHV2-5*02 F | 94.16 | IGHD3-10*01 F   | IGHJ4*02 F | 17 | AHRGYLYGSWDVGVWFDY | CLUSTER-4-0003 |
| NL-04-0173-H1 | CLL | IGHV2-5*02 F | 95.88 | IGHD2-2*02 F    | IGHJ4*02 F | 17 | AHRRFLSGSWDTGYFDY  | CLUSTER-4-0003 |
| NY-01-1026-H1 | CLL | IGHV2-5*02 F | 93.81 | IGHD3-9*01 F    | IGHJ4*02 F | 17 | AHRGTLSGFWDTGDFDY  | CLUSTER-4-0003 |
| DK-01-0081-H1 | CLL | IGHV2-5*02 F | 92.1  | IGHD1-20*01 F   | IGHJ4*02 F | 17 | AHRRRELQGSWSEGYFDY | CLUSTER-4-0003 |
| DE-02-3635-H1 | CLL | IGHV2-5*02 F | 94.3  | IGHD6-13*01 F   | IGHJ4*02 F | 17 | AHRRGPSVSWDGGYFDY  | CLUSTER-4-0003 |
| DK-01-0925-H1 | CLL | IGHV2-5*02 F | 96.91 | IGHD1-1*01 F    | IGHJ4*02 F | 17 | AHRRGYASNWDVGYFDY  | CLUSTER-4-0003 |
| US-01-0554-H1 | CLL | IGHV2-5*02 F | 90.79 | IGHD6-13*01 F   | IGHJ5*02 F | 17 | AHRRQYSGNWDVGVWFDY | CLUSTER-4-0003 |
| DE-02-3283-H1 | CLL | IGHV2-5*02 F | 91.45 | IGHD2-21*01 F   | IGHJ4*02 F | 17 | AHRSISGSPWAKAYFDY  | CLUSTER-4-0003 |
| DE-03-4343-H1 | CLL | IGHV2-5*02 F | 92.44 | IGHD2-15*01 F   | IGHJ4*02 F | 17 | AHRRGSGSPWDNAYFDY  | CLUSTER-4-0003 |
| US-01-0229-H1 | CLL | IGHV2-5*02 F | 92.97 | IGHD3-16*01 F   | IGHJ4*02 F | 17 | AHRLASGSPWVNAYFDY  | CLUSTER-4-0003 |
| RU-01-0308-H1 | CLL | IGHV2-5*02 F | 92.31 | IGHD2-15*01 F   | IGHJ4*02 F | 17 | AHRSRRGSPWALSDFDY  | CLUSTER-4-0003 |
| DE-03-0064-H1 | CLL | IGHV2-5*02 F | 91.24 | IGHD3-3*01 F    | IGHJ4*02 F | 17 | AHRRQHNGNWDGDFDY   | CLUSTER-4-0003 |
| UK-01-0701-H1 | CLL | IGHV2-5*02 F | 95.19 | IGHD1-7*01 F    | IGHJ4*02 F | 17 | AHRRQLNGNWDGGHFDY  | CLUSTER-4-0003 |
| DE-03-0266-H1 | CLL | IGHV2-5*02 F | 90.55 | IGHD1-1*01 F    | IGHJ3*01 F | 17 | AHRVYLNGNWDGGVFDY  | CLUSTER-4-0003 |
| DE-03-3116-H1 | CLL | IGHV2-5*02 F | 91.29 | IGHD1-1*01 F    | IGHJ4*02 F | 17 | ARRGWLGNWDGGYFDY   | CLUSTER-4-0003 |
| AT-01-0113-H1 | CLL | IGHV2-5*02 F | 92.78 | IGHD1-7*01 F    | IGHJ4*02 F | 17 | AHRQMKMRDWNNGYFDY  | CLUSTER-4-0003 |
| DE-02-5072-H1 | CLL | IGHV2-5*02 F | 93.42 | IGHD1-1*01 F    | IGHJ4*02 F | 17 | AHRRVVRMRDWNHGDFDY | CLUSTER-4-0003 |

|               |     |              |       |               |            |    |                    |                |
|---------------|-----|--------------|-------|---------------|------------|----|--------------------|----------------|
| IT-05-0189-H1 | CLL | IGHV2-5*02 F | 95.88 | IGHD2-15*01 F | IGHJ4*02 F | 17 | AHRRQLGGSWNYGDFDY  | CLUSTER-4-0003 |
| UK-01-0510-H1 | CLL | IGHV2-5*02 F | 91.07 | IGHD2-21*01 F | IGHJ4*02 F | 17 | AHRRYIGGYWDYGDFDY  | CLUSTER-4-0003 |
| DK-01-1541-H1 | CLL | IGHV2-5*02 F | 93.13 | IGHD6-13*01 F | IGHJ4*02 F | 17 | AHRRVYSGSWSYGDFDY  | CLUSTER-4-0003 |
| ES-01-0205-H1 | CLL | IGHV2-5*02 F | 95.88 | IGHD1-7*01 F  | IGHJ4*02 F | 17 | AHRRPQSSSWDYGDFDF  | CLUSTER-4-0003 |
| IT-01-0310-H1 | CLL | IGHV2-5*02 F | 99.66 | IGHD3-10*01 F | IGHJ4*02 F | 17 | AHRRVGSRSWDVGDYFDY | CLUSTER-4-0003 |
| DE-03-3400-H1 | CLL | IGHV2-5*02 F | 96.56 | IGHD3-3*01 F  | IGHJ4*02 F | 17 | AHRRAYHGVWDGGNFDY  | CLUSTER-4-0003 |
| GR-01-0107-H1 | CLL | IGHV2-5*02 F | 95.4  | IGHD2-21*01 F | IGHJ4*02 F | 17 | AHRRDYYGAWDEGYFDY  | CLUSTER-4-0003 |
| NL-01-0583-H1 | CLL | IGHV2-5*02 F | 89.56 | IGHD2-15*01 F | IGHJ3*02 F | 17 | AHRRDYNGLWDGGTFDI  | CLUSTER-4-0003 |
| CZ-01-1411-H1 | CLL | IGHV2-5*02 F | 93.47 | IGHD5-12*01 F | IGHJ4*02 F | 17 | AHRRIVGSPWGHYYFDY  | CLUSTER-4-0003 |
| DE-03-2121-H1 | CLL | IGHV2-5*02 F | 96.36 | IGHD1-26*01 F | IGHJ4*02 F | 17 | AHRLASGAPWGMYYFDY  | CLUSTER-4-0003 |
| NL-04-0089-H1 | CLL | IGHV2-5*02 F | 98.28 | IGHD6-13*01 F | IGHJ4*02 F | 17 | AHRVAAGSPWGSYYFDY  | CLUSTER-4-0003 |
| DE-03-3486-H1 | CLL | IGHV2-5*02 F | 93.13 | IGHD1-26*01 F | IGHJ4*02 F | 17 | AHRRIVGGPWARGEYDY  | CLUSTER-4-0003 |
| FR-01-0712-H1 | CLL | IGHV2-5*02 F | 93.81 | IGHD2-15*01 F | IGHJ4*02 F | 17 | AHRRIVGGPWVRVDFDY  | CLUSTER-4-0003 |
| DE-03-0094-H1 | CLL | IGHV2-5*02 F | 92.36 | IGHD2-2*01 F  | IGHJ4*02 F | 17 | AHRLPSDSPWDWGYFDY  | CLUSTER-4-0003 |
| DK-01-1564-H1 | CLL | IGHV2-5*02 F | 93.47 | IGHD2-15*01 F | IGHJ3*02 F | 17 | AHRLRRGSPWEWGAFDI  | CLUSTER-4-0003 |
| IT-05-0506-H1 | CLL | IGHV2-5*02 F | 92.44 | IGHD3-10*01 F | IGHJ4*02 F | 17 | AHRLPSGSPWDWGDFDF  | CLUSTER-4-0003 |
| AT-01-0087-H1 | CLL | IGHV2-5*02 F | 95.19 | IGHD1-7*01 F  | IGHJ5*01 F | 17 | ANRRPQGHSDWYGVFDS  | CLUSTER-4-0003 |
| DE-03-2539-H1 | CLL | IGHV2-5*02 F | 94.16 | IGHD4-17*01 F | IGHJ4*02 F | 17 | AHRMQHNGDWDVGYFDS  | CLUSTER-4-0003 |
| DK-01-0302-H1 | CLL | IGHV2-5*02 F | 92.44 | IGHD1-7*01 F  | IGHJ3*01 F | 17 | AHRQYQMSDWNYGDFDF  | CLUSTER-4-0003 |
| NL-01-0926-H1 | CLL | IGHV2-5*02 F | 94.17 | IGHD1-26*01 F | IGHJ4*02 F | 17 | AHRRAYGGSWNYGEFDY  | CLUSTER-4-0003 |
| US-01-1358-H1 | CLL | IGHV2-5*02 F | 93.47 | IGHD6-19*01 F | IGHJ4*02 F | 17 | AHRRAGGGGWNEGYFDS  | CLUSTER-4-0003 |
| CZ-01-1028-H1 | CLL | IGHV2-5*02 F | 93.13 | IGHD6-19*01 F | IGHJ4*02 F | 17 | AHRRPGSAGWNEGLFDY  | CLUSTER-4-0003 |
| DE-02-3681-H1 | CLL | IGHV2-5*02 F | 92.64 | IGHD1-1*01 F  | IGHJ4*02 F | 17 | AHRHPLMSTWDHGSFDF  | CLUSTER-4-0003 |
| NY-01-0151-H1 | CLL | IGHV2-5*02 F | 93.13 | IGHD2-2*01 F  | IGHJ4*02 F | 17 | AHRRHQGDTWSYGAFDY  | CLUSTER-4-0003 |
| DK-01-1589-H1 | CLL | IGHV2-5*02 F | 91.07 | IGHD2-21*02 F | IGHJ3*01 F | 17 | ARRQSYNGAWDGGVLDV  | CLUSTER-4-0003 |
| DE-03-0496-H1 | CLL | IGHV2-5*02 F | 93.09 | IGHD1-1*01 F  | IGHJ4*02 F | 17 | AHRRGPYTNWDDADFDY  | CLUSTER-4-0003 |
| DE-02-4636-H1 | CLL | IGHV2-5*02 F | 93.42 | IGHD6-13*01 F | IGHJ4*01 F | 17 | AHRRPTSSSWFLVYFDY  | CLUSTER-4-0003 |
| DE-03-1733-H1 | CLL | IGHV2-5*02 F | 93.13 | IGHD2-8*01 F  | IGHJ3*02 F | 17 | AHRISLNQKWDEAAFDI  | CLUSTER-4-0003 |
| DE-03-1240-H1 | CLL | IGHV2-5*02 F | 93.13 | IGHD6-19*01 F | IGHJ4*02 F | 17 | AHRLLGSGGWDVGVFDY  | CLUSTER-4-0003 |
| DK-01-0800-H1 | CLL | IGHV2-5*02 F | 93.81 | IGHD6-19*01 F | IGHJ4*02 F | 17 | VHRQPNSSGGWDTGCFDY | CLUSTER-4-0003 |

|               |     |              |       |                 |            |    |                    |                |
|---------------|-----|--------------|-------|-----------------|------------|----|--------------------|----------------|
| UK-03-0188-H1 | CLL | IGHV2-5*02 F | 90.38 | IGHD6-19*01 F   | IGHJ4*02 F | 17 | AHRQIGSGDWDHGTFDY  | CLUSTER-4-0003 |
| US-01-1257-H1 | CLL | IGHV2-5*02 F | 92.55 | IGHD3-3*01 F    | IGHJ4*03 F | 17 | AHRKIGSGGWDVGAFDY  | CLUSTER-4-0003 |
| US-01-1283-H1 | CLL | IGHV2-5*02 F | 95.31 | IGHD3-10*02 F   | IGHJ4*02 F | 17 | VHRQIGSGSVDVGVFDY  | CLUSTER-4-0003 |
| DE-02-0221-H1 | CLL | IGHV2-5*02 F | 92.78 | IGHD5-12*01 F   | IGHJ4*02 F | 17 | AHRRPYHGNWNWGDFFDY | CLUSTER-4-0003 |
| NL-04-0160-H1 | CLL | IGHV2-5*02 F | 93.81 | IGHD3-3*01 F    | IGHJ4*02 F | 17 | AHRRPYQGLWDWGDFFDF | CLUSTER-4-0003 |
| DK-01-0379-H1 | CLL | IGHV2-5*02 F | 94.16 | IGHD1-7*01 F    | IGHJ5*02 F | 17 | AHRLPFSINWNYGWFDP  | CLUSTER-4-0003 |
| NL-01-1206-H1 | CLL | IGHV2-5*02 F | 93.17 | IGHD1-1*01 F    | IGHJ5*01 F | 17 | AHRLPFSNWDVGVFDP   | CLUSTER-4-0003 |
| NY-01-0439-H1 | CLL | IGHV2-5*02 F | 95.53 | IGHD2-8*01 F    | IGHJ5*02 F | 17 | AHRRPFSYDWNWGWFDP  | CLUSTER-4-0003 |
| DE-03-3785-H1 | CLL | IGHV2-5*02 F | 93.13 | IGHD1-26*01 F   | IGHJ4*02 F | 17 | AHRRPYGNGWGSYFDY   | CLUSTER-4-0003 |
| DE-02-3914-H1 | CLL | IGHV2-5*02 F | 88.46 | IGHD4-23*01 ORF | IGHJ5*02 F | 17 | AHRRDFRGNWDVGVFGP  | CLUSTER-4-0003 |
| DK-01-1581-H1 | CLL | IGHV2-5*02 F | 91.07 | IGHD3-16*02 F   | IGHJ5*02 F | 17 | AHRRFSGDWDVGVWLGPF | CLUSTER-4-0003 |
| DE-03-0817-H1 | CLL | IGHV2-5*02 F | 93.81 | IGHD4-23*01 ORF | IGHJ5*02 F | 17 | VHRRAYNGNWDVGVFDP  | CLUSTER-4-0003 |
| DK-01-0997-H1 | CLL | IGHV2-5*02 F | 95.19 | IGHD6-13*01 F   | IGHJ5*02 F | 17 | VHRIAYSGNWDVGVFDP  | CLUSTER-4-0003 |
| NY-01-0285-H1 | CLL | IGHV2-5*02 F | 94.85 | IGHD4-17*01 F   | IGHJ4*02 F | 17 | AHRELNADWDYGDFFDY  | CLUSTER-4-0003 |
| IT-01-0281-H1 | CLL | IGHV2-5*02 F | 90.38 | IGHD2-15*01 F   | IGHJ4*02 F | 17 | AHRLVQNGDWNFGSFDH  | CLUSTER-4-0003 |
| IT-05-0360-H1 | CLL | IGHV2-5*02 F | 96.91 | IGHD1-7*01 F    | IGHJ4*02 F | 17 | AHRLKLNWNWNGYFDY   | CLUSTER-4-0003 |
| DE-03-0108-H1 | CLL | IGHV2-5*02 F | 89.21 | IGHD1-20*01 F   | IGHJ4*02 F | 17 | AHRVAYNTNWNWEGFFDY | CLUSTER-4-0003 |
| DE-03-3483-H1 | CLL | IGHV2-5*02 F | 93.47 | IGHD1-20*01 F   | IGHJ4*02 F | 17 | AHRRYNSNWNWEGVFDY  | CLUSTER-4-0003 |
| DE-02-2771-H1 | CLL | IGHV2-5*02 F | 96.67 | IGHD2-21*02 F   | IGHJ4*02 F | 17 | VHRRLRSGDWDLGEFDY  | CLUSTER-4-0003 |
| DE-02-2967-H1 | CLL | IGHV2-5*02 F | 90.38 | IGHD6-25*01 F   | IGHJ4*02 F | 17 | AHRRPRSGDWATGDFDY  | CLUSTER-4-0003 |
| UK-03-0119-H1 | CLL | IGHV2-5*02 F | 95.53 | IGHD2-21*02 F   | IGHJ4*01 F | 17 | AHRRARNGDWNWGDFFDY | CLUSTER-4-0003 |
| UK-01-0311-H1 | CLL | IGHV2-5*02 F | 95.19 | IGHD3-9*01 F    | IGHJ4*02 F | 17 | AHRISRYSDWLYGSFDY  | CLUSTER-4-0003 |
| DE-03-1676-H1 | CLL | IGHV2-5*02 F | 94.85 | IGHD2-8*01 F    | IGHJ4*02 F | 17 | AHRVVANGLWDGGHFNY  | CLUSTER-4-0003 |
| CZ-01-0731-H1 | CLL | IGHV2-5*02 F | 92.44 | IGHD6-13*01 F   | IGHJ4*03 F | 17 | AHRQSHNSDWNWGTFDY  | CLUSTER-4-0003 |
| DE-03-3905-H1 | CLL | IGHV2-5*02 F | 95.53 | IGHD4-11*01 ORF | IGHJ4*02 F | 17 | AHRRAHNGDWNWATFFDF | CLUSTER-4-0003 |
| DE-02-2685-H1 | CLL | IGHV2-5*02 F | 90.35 | IGHD2-15*01 F   | IGHJ4*02 F | 17 | AHRRPDSGYWDGGTFDS  | CLUSTER-4-0003 |
| DK-01-0758-H1 | CLL | IGHV2-5*02 F | 93.81 | IGHD1-1*01 F    | IGHJ4*02 F | 17 | AHRRPDYGNWDEGIFDY  | CLUSTER-4-0003 |
| DK-01-0167-H1 | CLL | IGHV2-5*02 F | 94.5  | IGHD3-3*01 F    | IGHJ4*02 F | 17 | AHRRARGLYWDGDFDY   | CLUSTER-4-0003 |
| GR-02-0174-H1 | CLL | IGHV2-5*02 F | 94.5  | IGHD1-7*01 F    | IGHJ4*02 F | 17 | AHRRYNMAYWNYGYFDY  | CLUSTER-4-0003 |
| NY-01-0280-H1 | CLL | IGHV2-5*02 F | 93.81 | IGHD7-27*01 F   | IGHJ4*02 F | 17 | AHRVAHSANWDVGVFFDY | CLUSTER-4-0003 |



|               |     |              |       |               |            |    |                    |                |
|---------------|-----|--------------|-------|---------------|------------|----|--------------------|----------------|
| CZ-01-1603-H1 | CLL | IGHV2-5*02 F | 93.47 | IGHD1-7*01 F  | IGHJ4*02 F | 17 | AHRLRYMGNWDYGDYFDY | CLUSTER-4-0003 |
| DE-03-4518-H1 | CLL | IGHV2-5*02 F | 93.81 | IGHD3-10*01 F | IGHJ4*01 F | 17 | AHRLRIRGFWDGGDFDY  | CLUSTER-4-0003 |
| DE-02-0020-H1 | CLL | IGHV2-5*02 F | 93.47 | IGHD6-19*01 F | IGHJ4*02 F | 17 | AHRRLYSGRWDEATFDY  | CLUSTER-4-0003 |
| DE-03-1169-H1 | CLL | IGHV2-5*02 F | 92.1  | IGHD1-1*01 F  | IGHJ4*02 F | 17 | AHRRDYSGDWNNEATFDY | CLUSTER-4-0003 |
| DE-03-3323-H1 | CLL | IGHV2-5*02 F | 96.56 | IGHD1-7*01 F  | IGHJ4*02 F | 17 | AHRRDVRRDWNYG DYDF | CLUSTER-4-0003 |
| ES-01-0338-H1 | CLL | IGHV2-5*02 F | 94.85 | IGHD1-7*01 F  | IGHJ4*02 F | 17 | AHRRDVRNNWNYGDYFDY | CLUSTER-4-0003 |
| DE-03-3114-H1 | CLL | IGHV2-5*02 F | 92.1  | IGHD3-9*01 F  | IGHJ4*02 F | 17 | AHRVSLTGYWDYGAFDS  | CLUSTER-4-0003 |
| DE-03-3953-H1 | CLL | IGHV2-5*02 F | 92.44 | IGHD3-9*01 F  | IGHJ4*02 F | 17 | AHRLTLTGYWDQGVFNY  | CLUSTER-4-0003 |
| DE-03-3966-H1 | CLL | IGHV2-5*02 F | 94.5  | IGHD3-10*01 F | IGHJ4*02 F | 17 | AHRQSLTGYWNSGVLDY  | CLUSTER-4-0003 |
| DE-03-3587-H1 | CLL | IGHV2-5*02 F | 92.44 | IGHD1-1*01 F  | IGHJ5*02 F | 17 | AYRLHHSANWDVGVWFGP | CLUSTER-4-0003 |
| DE-02-0294-H1 | CLL | IGHV2-5*02 F | 89.0  | IGHD6-25*01 F | IGHJ5*02 F | 17 | AHRAHNSDWNNSGWFDY  | CLUSTER-4-0003 |
| DE-03-4633-H1 | CLL | IGHV2-5*02 F | 95.53 | IGHD6-13*01 F | IGHJ5*02 F | 17 | AHRLAYSSSWNSGWFDY  | CLUSTER-4-0003 |
| UK-01-0375-H1 | CLL | IGHV2-5*02 F | 91.75 | IGHD6-13*01 F | IGHJ5*02 F | 17 | VHRLHYSGDWNNSGWFDY | CLUSTER-4-0003 |
| ES-01-0401-H1 | CLL | IGHV2-5*02 F | 94.2  | IGHD1-1*01 F  | IGHJ5*02 F | 17 | AHRLAYGDNWNAGWFDY  | CLUSTER-4-0003 |
| IT-07-0414-H1 | CLL | IGHV2-5*02 F | 92.1  | IGHD3-10*01 F | IGHJ4*02 F | 17 | AHRVHRNSDWGSGDFDY  | CLUSTER-4-0003 |
| DE-03-3342-H1 | CLL | IGHV2-5*02 F | 93.47 | IGHD1-1*01 F  | IGHJ3*02 F | 17 | AHRVPYSANWNGGSFDY  | CLUSTER-4-0003 |
| ES-01-0612-H1 | CLL | IGHV2-5*02 F | 89.23 | IGHD1-7*01 F  | IGHJ3*02 F | 17 | GHRPFLSNWNYGTFDY   | CLUSTER-4-0003 |
| DE-03-2342-H1 | CLL | IGHV2-5*02 F | 95.88 | IGHD6-13*01 F | IGHJ3*01 F | 17 | AHRVPYSSSWSWGAFDY  | CLUSTER-4-0003 |
| AT-01-0092-H1 | CLL | IGHV2-5*01 F | 96.56 | IGHD2-2*01 F  | IGHJ3*02 F | 17 | AHRPPFCSTTSWGFNI   | CLUSTER-4-0003 |
| GR-01-0468-H1 | CLL | IGHV2-5*02 F | 93.81 | IGHD1-7*01 F  | IGHJ4*02 F | 17 | AHRLPLASDWNNGRFDY  | CLUSTER-4-0003 |
| NY-01-0989-H1 | CLL | IGHV2-5*02 F | 95.19 | IGHD1-1*01 F  | IGHJ4*02 F | 17 | AHRLRLQSDWNNGRFDY  | CLUSTER-4-0003 |
| DE-02-0204-H1 | CLL | IGHV2-5*02 F | 95.19 | IGHD1-7*01 F  | IGHJ4*02 F | 17 | AHRLAASSNWNNGDFDY  | CLUSTER-4-0003 |
| DE-03-1329-H1 | CLL | IGHV2-5*02 F | 96.22 | IGHD6-19*01 F | IGHJ4*02 F | 17 | AHRLHSGDWNNGNFDF   | CLUSTER-4-0003 |
| RU-01-0343-H1 | CLL | IGHV2-5*02 F | 91.81 | IGHD6-13*01 F | IGHJ4*02 F | 17 | AHRLIASGNWQAGSFDY  | CLUSTER-4-0003 |
| GR-03-0103-H1 | CLL | IGHV2-5*01 F | 95.19 | IGHD5-18*01 F | IGHJ4*02 F | 17 | AHRQLHRDYSYGRFDY   | CLUSTER-4-0003 |
| DE-03-1706-H1 | CLL | IGHV2-5*02 F | 92.1  | IGHD3-16*01 F | IGHJ4*01 F | 17 | AHRRFLHSNWGWGDFDY  | CLUSTER-4-0003 |
| CZ-01-0313-H1 | CLL | IGHV2-5*02 F | 90.38 | IGHD1-1*01 F  | IGHJ4*02 F | 17 | AHRRPYGNWNEGIFNY   | CLUSTER-4-0003 |
| DE-03-4024-H1 | CLL | IGHV2-5*02 F | 95.53 | IGHD6-13*01 F | IGHJ4*02 F | 17 | AHRRGDSNWNWYGVFDY  | CLUSTER-4-0003 |
| UK-01-0605-H1 | CLL | IGHV2-5*02 F | 94.16 | IGHD7-27*01 F | IGHJ4*03 F | 17 | AHRLVYNSNWGVGYFDP  | CLUSTER-4-0003 |
| DE-02-5055-H1 | CLL | IGHV2-5*02 F | 94.89 | IGHD1-26*01 F | IGHJ4*02 F | 17 | AHRRVGNQWFWGDFDY   | CLUSTER-4-0003 |

|               |     |              |       |                 |            |    |                    |                |
|---------------|-----|--------------|-------|-----------------|------------|----|--------------------|----------------|
| DK-01-0519-H1 | CLL | IGHV2-5*02 F | 94.5  | IGHD5-24*01 ORF | IGHJ4*02 F | 17 | AHRHRDAYNWDSGFFDY  | CLUSTER-4-0003 |
| CH-01-0007-H1 | CLL | IGHV2-5*02 F | 94.5  | IGHD6-13*01 F   | IGHJ4*02 F | 17 | AHRMAYGLNWTGYFDY   | CLUSTER-4-0003 |
| UK-03-0421-H1 | CLL | IGHV2-5*02 F | 94.5  | IGHD5-12*01 F   | IGHJ4*02 F | 17 | AHRVHSSYNWDSGYFDF  | CLUSTER-4-0003 |
| GR-03-0111-H1 | CLL | IGHV2-5*02 F | 95.73 | IGHD6-13*01 F   | IGHJ4*02 F | 17 | AHRLDESRSWYRGAFDY  | CLUSTER-4-0003 |
| DE-03-1075-H1 | CLL | IGHV2-5*02 F | 95.88 | IGHD6-19*01 F   | IGHJ4*02 F | 17 | AHRLPQRGGWDVGVFDF  | CLUSTER-4-0003 |
| SE-01-0613-H1 | CLL | IGHV2-5*02 F | 95.9  | IGHD6-13*01 F   | IGHJ4*02 F | 17 | AHRRQFNDSWSWGDFDY  | CLUSTER-4-0003 |
| DK-01-1171-H1 | CLL | IGHV2-5*02 F | 96.91 | IGHD6-13*01 F   | IGHJ4*02 F | 17 | AHRRIHNSYWSSGDFDY  | CLUSTER-4-0003 |
| DK-01-1159-H1 | CLL | IGHV2-5*02 F | 94.85 | IGHD6-13*01 F   | IGHJ4*02 F | 17 | AHRLPGIGDWDTGVLDY  | CLUSTER-4-0003 |
| DE-03-3125-H1 | CLL | IGHV2-5*02 F | 96.22 | IGHD4-17*01 F   | IGHJ4*02 F | 17 | AHRQSHYGDWDIGVFDY  | CLUSTER-4-0003 |
| NY-01-0690-H1 | CLL | IGHV2-5*02 F | 93.47 | IGHD2-8*01 F    | IGHJ4*02 F | 17 | AHRQSTKSPWNYGDFDY  | CLUSTER-4-0003 |
| NL-01-1149-H1 | CLL | IGHV2-5*02 F | 93.98 | IGHD3-3*01 F    | IGHJ4*02 F | 17 | AHRQYLYSDWNWATFDS  | CLUSTER-4-0003 |
| UK-01-0732-H1 | CLL | IGHV2-5*02 F | 94.16 | IGHD3-9*01 F    | IGHJ4*02 F | 17 | AHRRMTRHPWDRGDFDY  | CLUSTER-4-0003 |
| DK-01-0399-H1 | CLL | IGHV2-5*02 F | 93.47 | IGHD1-1*01 F    | IGHJ4*02 F | 17 | AHRRLRNGDWNNEGLFDR | CLUSTER-4-0003 |
| US-01-1156-H1 | CLL | IGHV2-5*02 F | 92.97 | IGHD6-19*01 F   | IGHJ4*02 F | 17 | AHRRHHNGDWNHGEFDY  | CLUSTER-4-0003 |
| DE-02-5166-H1 | CLL | IGHV2-5*02 F | 93.59 | IGHD1-14*01 ORF | IGHJ4*02 F | 17 | AHRLVGMNEWNHGYFDY  | CLUSTER-4-0003 |
| DK-01-1277-H1 | CLL | IGHV2-5*02 F | 96.22 | IGHD1-7*01 F    | IGHJ4*02 F | 17 | AHRLPGYQNWNNGYFDY  | CLUSTER-4-0003 |
| GR-02-0483-H1 | CLL | IGHV2-5*02 F | 95.53 | IGHD1-7*01 F    | IGHJ4*02 F | 17 | SHRRRIMSDWNYGSFDY  | CLUSTER-4-0003 |
| DE-03-2074-H1 | CLL | IGHV2-5*02 F | 92.36 | IGHD2-15*01 F   | IGHJ4*02 F | 17 | AHRRLYNGDWDVRGVFDH | CLUSTER-4-0003 |
| DE-03-1275-H1 | CLL | IGHV2-5*02 F | 93.81 | IGHD6-19*01 F   | IGHJ4*02 F | 17 | AHRKLYNNDWDRGILDY  | CLUSTER-4-0003 |
| FR-01-0852-H1 | CLL | IGHV2-5*02 F | 93.47 | IGHD3-3*01 F    | IGHJ5*02 F | 17 | AHRVLWNGYWDQGWFDH  | CLUSTER-4-0003 |
| FR-01-0065-H1 | CLL | IGHV2-5*02 F | 86.19 | IGHD6-19*01 F   | IGHJ5*01 F | 17 | THRVLWNSHWDLGWFDP  | CLUSTER-4-0003 |
| NY-01-0791-H1 | CLL | IGHV2-5*02 F | 93.81 | IGHD3-3*01 F    | IGHJ4*02 F | 17 | AHRANWNGYWDLSYFDY  | CLUSTER-4-0003 |
| CZ-01-0442-H1 | CLL | IGHV2-5*02 F | 95.19 | IGHD2-8*02 F    | IGHJ3*01 F | 17 | AHRKAENNAWDTGVFDF  | CLUSTER-4-0003 |
| DE-02-4458-H1 | CLL | IGHV2-5*02 F | 93.94 | IGHD6-13*01 F   | IGHJ4*02 F | 17 | AHRGIMNTNWDSGYFDF  | CLUSTER-4-0003 |
| SE-01-0685-H1 | CLL | IGHV2-5*02 F | 93.98 | IGHD1-1*01 F    | IGHJ4*02 F | 17 | AHRVTGNNIWDGGALDF  | CLUSTER-4-0003 |

**Supplemental Table 9.** Basic immunogenetic information of all expanded BcR IG clonotypes (>1 sequence) from the present study that were assigned to major CLL stereotyped subsets<sup>4</sup>.

| Sample ID | Sample category         | IGHV gene | SHM status, % | IGHD gene | IGHJ gene | CDR3 sequence          | CDR3 length | Frequency, % | Subset |
|-----------|-------------------------|-----------|---------------|-----------|-----------|------------------------|-------------|--------------|--------|
| mcMBL-14  | PBMC, LC-MBL            | IGHV1-3   | 100           | IGHD6-19  | IGHJ4     | AREQWLVRVNFYD          | 13          | 0.00512      | CLL#1  |
| mcMBL-14  | PBMC, LC-MBL            | IGHV1-3   | 99.65         | IGHD6-19  | IGHJ4     | AREQWLVRGNFYD          | 13          | 0.00046      | CLL#1  |
| mcMBL-14  | PBMC, LC-MBL            | IGHV1-3   | 99.65         | IGHD6-19  | IGHJ4     | AREQWLVRVQGNFYD        | 13          | 0.00023      | CLL#1  |
| mcMBL-14  | PBMC, LC-MBL            | IGHV1-3   | 100           | IGHD6-19  | IGHJ4     | AREQWLVRVDFYD          | 13          | 0.00023      | CLL#1  |
| mcMBL-14  | PBMC, LC-MBL            | IGHV1-2   | 98.96         | IGHD6-19  | IGHJ4     | ARGQWLVRVQGNFYD        | 13          | 0.00209      | CLL#1  |
| mcMBL-14  | PBMC, LC-MBL            | IGHV1-18  | 98.96         | IGHD6-19  | IGHJ4     | ARGQWLVRVQGNFYD        | 13          | 0.00023      | CLL#1  |
| bMBL-14   | Normal B cells, LC-MBL  | IGHV1-2   | 99.65         | IGHD6-19  | IGHJ4     | ARGQWLVRVQGNFYD        | 13          | 0.00259      | CLL#1  |
| bMBL-19   | Normal B cells, LC-MBL  | IGHV1-2   | 100           | IGHD6-19  | IGHJ4     | ARAQWLVRVDFYD          | 13          | 0.00642      | CLL#1  |
| naB-5     | Naïve B cells, Healthy  | IGHV5-51  | 100           | IGHD6-19  | IGHJ4     | ARLQWLVRDFYD           | 13          | 0.00048      | CLL#1  |
| MBL-12    | MBL cells, LC-MBL       | IGHV3-21  | 93.05         | IGHD5-12  | IGHJ6     | ATDRNCMDV              | 9           | 0.00024      | CLL#2  |
| MBL-12    | MBL cells, LC-MBL       | IGHV3-21  | 93.41         | IGHD5-12  | IGHJ6     | ATDRNGIDV              | 9           | 0.00024      | CLL#2  |
| MBL-12    | MBL cells, LC-MBL       | IGHV3-21  | 93.05         | IGHD5-12  | IGHJ6     | ATDRNGMDV              | 9           | 0.04441      | CLL#2  |
| MBL-7     | MBL cells, LC-MBL       | IGHV3-21  | 97.22         | IGHD5-12  | IGHJ6     | ATDRNGMDV              | 9           | 0.00024      | CLL#2  |
| mcMBL-14  | PBMC, LC-MBL            | IGHV3-21  | 98.25         | -         | IGHJ6     | ARDQNGMDV              | 9           | 0.00023      | CLL#2  |
| mcMBL-16  | PBMC, LC-MBL            | IGHV3-21  | 98.61         | -         | IGHJ6     | ARDQNAMDV              | 9           | 0.00025      | CLL#2  |
| bMBL-10   | Normal B cells, LC-MBL  | IGHV3-21  | 100           | IGHD1-26  | IGHJ6     | ARDRAGMDV              | 9           | 0.00029      | CLL#2  |
| bMBL-10   | Normal B cells, LC-MBL  | IGHV3-21  | 100           | IGHD3-10  | IGHJ6     | ARDRGGMDV              | 9           | 0.00029      | CLL#2  |
| bMBL-13   | Normal B cells, LC-MBL  | IGHV3-21  | 96.53         | IGHD6-13  | IGHJ6     | ARDKQDMDV              | 9           | 0.00032      | CLL#2  |
| bMBL-17   | Normal B cells, LC-MBL  | IGHV3-21  | 95.49         | IGHD3-16  | IGHJ6     | ARDFRGMDV              | 9           | 0.00028      | CLL#2  |
| naB-3     | Naïve B cells, Healthy  | IGHV3-21  | 100           | IGHD1-1   | IGHJ3     | ARETYAFDV              | 9           | 0.00016      | CLL#2  |
| meB-1     | Memory B cells, Healthy | IGHV3-21  | 89.93         | -         | IGHJ6     | AGDNYGLDV              | 9           | 0.00017      | CLL#2  |
| meB-1     | Memory B cells, Healthy | IGHV3-21  | 90.28         | -         | IGHJ6     | AKDNYGLDV              | 9           | 0.00017      | CLL#2  |
| meB-1     | Memory B cells, Healthy | IGHV3-21  | 92.71         | -         | IGHJ6     | ARDNYGMDV              | 9           | 0.00017      | CLL#2  |
| meB-2     | Memory B cells, Healthy | IGHV3-21  | 88.53         | IGHD2-2   | IGHJ6     | AGELYHLDV              | 9           | 0.00046      | CLL#2  |
| MBL-9     | MBL cells, LC-MBL       | IGHV1-69  | 100           | IGHD2-2   | IGHJ6     | ARAEDIVVVPAAISYYYYGMDV | 22          | 0.02824      | CLL#3  |

|          |                         |          |       |          |       |                         |    |         |       |
|----------|-------------------------|----------|-------|----------|-------|-------------------------|----|---------|-------|
| MBL-9    | MBL cells, LC-MBL       | IGHV1-69 | 100   | IGHD2-2  | IGHJ6 | ARAEDIVVVPAAISFYYYGMDV  | 22 | 0.00027 | CLL#3 |
| MBL-9    | MBL cells, LC-MBL       | IGHV1-69 | 100   | IGHD2-2  | IGHJ6 | ARAEDIVVVPAAISYYYYGMDV  | 22 | 0.00027 | CLL#3 |
| mcMBL-20 | PBMC, LC-MBL            | IGHV1-69 | 100   | IGHD2-2  | IGHJ6 | ARAEDIVVVPAAISYYYYGMDV  | 22 | 0.00022 | CLL#3 |
| bMBL-17  | Normal B cells, LC-MBL  | IGHV1-69 | 99.65 | IGHD2-2  | IGHJ6 | ARGVGDIVVVPAAKSYYYYGMDV | 22 | 0.00028 | CLL#3 |
| bMBL-17  | Normal B cells, LC-MBL  | IGHV1-69 | 100   | IGHD2-2  | IGHJ6 | AGDWDIVVVPAAPPYYYYGMDV  | 22 | 0.00028 | CLL#3 |
| bMBL-17  | Normal B cells, LC-MBL  | IGHV1-69 | 100   | IGHD2-2  | IGHJ6 | ARDRDIVVVPAALYYYYYGMVDV | 22 | 0.00369 | CLL#3 |
| bMBL-17  | Normal B cells, LC-MBL  | IGHV1-69 | 100   | IGHD2-2  | IGHJ6 | ARDWDIVVVPAAPPYYYYGMDV  | 22 | 0.00199 | CLL#3 |
| bMBL-17  | Normal B cells, LC-MBL  | IGHV1-69 | 99.65 | IGHD2-2  | IGHJ6 | ARGVGDIVVVPAAKGYYYYGMDV | 22 | 0.01251 | CLL#3 |
| naB-1    | Naïve B cells, Healthy  | IGHV1-69 | 99.65 | IGHD2-2  | IGHJ6 | ARDVAGSVVPAATEGYYYGMDV  | 22 | 0.00314 | CLL#3 |
| naB-1    | Naïve B cells, Healthy  | IGHV1-69 | 99.65 | IGHD2-2  | IGHJ6 | ARVWVDIVVVPAAIWKSEGMDV  | 22 | 0.00279 | CLL#3 |
| naB-1    | Naïve B cells, Healthy  | IGHV1-69 | 99.65 | IGHD2-2  | IGHJ6 | ARDQDIVVVPAAIRSGYYGMDV  | 22 | 0.00209 | CLL#3 |
| naB-1    | Naïve B cells, Healthy  | IGHV1-69 | 100   | IGHD2-15 | IGHJ6 | AREGGIVVVVAAWDYYYYYGMDV | 22 | 0.00034 | CLL#3 |
| naB-1    | Naïve B cells, Healthy  | IGHV1-69 | 100   | IGHD2-2  | IGHJ6 | ARVWVDIVVVPAAIWKSEGIDV  | 22 | 0.00034 | CLL#3 |
| naB-3    | Naïve B cells, Healthy  | IGHV1-69 | 99.65 | IGHD2-2  | IGHJ6 | ARDRGIVVVPAAI GYYYYYMDV | 22 | 0.00048 | CLL#3 |
| naB-3    | Naïve B cells, Healthy  | IGHV1-69 | 100   | IGHD2-2  | IGHJ6 | ARAGFDVVVPAALTYYYYYMDV  | 22 | 0.00032 | CLL#3 |
| naB-3    | Naïve B cells, Healthy  | IGHV1-69 | 99.65 | IGHD2-2  | IGHJ6 | ARDTNVIVVVPAAPDYYYGMDV  | 22 | 0.00016 | CLL#3 |
| naB-3    | Naïve B cells, Healthy  | IGHV1-69 | 100   | IGHD3-22 | IGHJ6 | ARGITMIVVGP GKYYYYYGMDV | 22 | 0.00016 | CLL#3 |
| meB-1    | Memory B cells, Healthy | IGHV1-69 | 94.1  | IGHD2-21 | IGHJ6 | ARGREDIVVVIGDNQKYYGMDV  | 22 | 0.00017 | CLL#3 |
| bMBL-1   | Normal B cells, LC-MBL  | IGHV4-34 | 100   | IGHD6-13 | IGHJ6 | ARVLPPDYSSRRYYYYYMDV    | 20 | 0.00059 | CLL#4 |
| naB-1    | Naïve B cells, Healthy  | IGHV4-34 | 98.95 | IGHD5-12 | IGHJ6 | AREDGIVATYRRYYYYGMDV    | 20 | 0.00034 | CLL#4 |
| naB-2    | Naïve B cells, Healthy  | IGHV4-34 | 99.65 | IGHD3-16 | IGHJ6 | ARGWGELSLLRRYYYYGMDV    | 20 | 0.01062 | CLL#4 |
| naB-2    | Naïve B cells, Healthy  | IGHV4-34 | 100   | IGHD3-16 | IGHJ6 | ARGWGELSLLRRYYYYGTDV    | 20 | 0.0004  | CLL#4 |
| naB-2    | Naïve B cells, Healthy  | IGHV4-34 | 100   | IGHD2-2  | IGHJ6 | ARGGPRAPAAKRYYYYYMDV    | 20 | 0.00817 | CLL#4 |
| naB-2    | Naïve B cells, Healthy  | IGHV4-34 | 100   | IGHD2-2  | IGHJ6 | ARGGPGAPAAKRYYYYYMDV    | 20 | 0.0004  | CLL#4 |
| naB-3    | Naïve B cells, Healthy  | IGHV4-34 | 100   | IGHD5-18 | IGHJ6 | ARVYIGELRSRRYYYYGMDV    | 20 | 0.00032 | CLL#4 |
| naB-3    | Naïve B cells, Healthy  | IGHV4-34 | 99.65 | IGHD5-12 | IGHJ6 | ARVRADIVATRYYYYGMDV     | 20 | 0.00016 | CLL#4 |
| naB-4    | Naïve B cells, Healthy  | IGHV4-34 | 99.3  | IGHD1-26 | IGHJ6 | ARGPKYLGATRYYYYGMDV     | 20 | 0.00226 | CLL#4 |
| naB-4    | Naïve B cells, Healthy  | IGHV4-34 | 100   | IGHD1-26 | IGHJ6 | ARGPKYLGATRYYYYGMDG     | 20 | 0.00028 | CLL#4 |
| mcMBL-13 | PBMC, LC-MBL            | IGHV1-69 | 100   | IGHD3-3  | IGHJ6 | ARGGDFGVVVIDAYYYGMDV    | 20 | 0.00516 | CLL#5 |
| naB-1    | Naïve B cells, Healthy  | IGHV1-69 | 99.65 | IGHD1-26 | IGHJ6 | ARDKGFVGVGATDCYYYYGMDV  | 20 | 0.00034 | CLL#5 |

|          |                         |          |       |          |       |                          |    |         |         |
|----------|-------------------------|----------|-------|----------|-------|--------------------------|----|---------|---------|
| naB-1    | Naïve B cells, Healthy  | IGHV1-69 | 99.65 | IGHD1-26 | IGHJ6 | ARDKGFVGRATDYYYYGMDV     | 20 | 0.00034 | CLL#5   |
| naB-1    | Naïve B cells, Healthy  | IGHV1-69 | 100   | IGHD1-26 | IGHJ6 | ARDKGLGVGATDYYYYGMDV     | 20 | 0.00034 | CLL#5   |
| naB-1    | Naïve B cells, Healthy  | IGHV1-69 | 100   | IGHD1-26 | IGHJ6 | ARDRGFVGVGATDYYYYGMDV    | 20 | 0.00034 | CLL#5   |
| naB-1    | Naïve B cells, Healthy  | IGHV1-69 | 99.65 | IGHD1-26 | IGHJ6 | ARDKGFVGVGATDYYYYGMDV    | 20 | 0.00279 | CLL#5   |
| naB-1    | Naïve B cells, Healthy  | IGHV1-69 | 100   | IGHD3-16 | IGHJ4 | ARSPNYDYVWGSYRRDHYFDY    | 21 | 0.00314 | CLL#6   |
| naB-1    | Naïve B cells, Healthy  | IGHV1-69 | 99.65 | IGHD3-16 | IGHJ3 | ARWAYDYVWGSYRPVGAFDI     | 21 | 0.00034 | CLL#6   |
| naB-1    | Naïve B cells, Healthy  | IGHV1-69 | 100   | IGHD3-3  | IGHJ6 | ARGDLYYDFWGSYWAGDYYYGMDV | 24 | 0.00034 | CLL#7H  |
| bMBL-10  | Normal B cells, LC-MBL  | IGHV1-2  | 100   | IGHD3-22 | IGHJ6 | ARDLYYYDSSGYNYGMDV       | 19 | 0.00832 | CLL#12  |
| bMBL-10  | Normal B cells, LC-MBL  | IGHV1-2  | 100   | IGHD3-22 | IGHJ6 | ARDLYYYDSSGYDYGMDV       | 19 | 0.00029 | CLL#12  |
| bMBL-10  | Normal B cells, LC-MBL  | IGHV1-2  | 98.96 | IGHD3-22 | IGHJ6 | ARNLYYYDSSGYNYGMDV       | 19 | 0.00029 | CLL#12  |
| naB-2    | Naïve B cells, Healthy  | IGHV1-2  | 94.51 | IGHD3-22 | IGHJ4 | ARDLGYDSSGYQKTRGY        | 19 | 0.0004  | CLL#12  |
| bMBL-1   | Normal B cells, LC-MBL  | IGHV4-4  | 94.79 | IGHD6-13 | IGHJ4 | VRGGHWRFDY               | 10 | 0.00029 | CLL#14  |
| bMBL-1   | Normal B cells, LC-MBL  | IGHV4-4  | 92.98 | IGHD6-13 | IGHJ4 | VRGGYWRFDY               | 10 | 0.00088 | CLL#14  |
| bMBL-14  | Normal B cells, LC-MBL  | IGHV4-4  | 88.89 | IGHD2-21 | IGHJ4 | AKGGDWQFDS               | 10 | 0.01076 | CLL#14  |
| meB-2    | Memory B cells, Healthy | IGHV4-4  | 95.49 | IGHD2-21 | IGHJ5 | ARGGDWRFDS               | 10 | 0.00138 | CLL#14  |
| meB-2    | Memory B cells, Healthy | IGHV4-4  | 95.83 | IGHD2-15 | IGHJ4 | ARGGGWRFDS               | 10 | 0.00046 | CLL#14  |
| MBL-2    | MBL cells, LC-MBL       | IGHV1-2  | 100   | IGHD2-21 | IGHJ6 | ARDLWGLGYYYYYGMDV        | 17 | 0.00234 | CLL#28A |
| MBL-5    | MBL cells, LC-MBL       | IGHV1-2  | 100   | IGHD6-19 | IGHJ6 | ARASSGWWNYYYYYGMDV       | 17 | 0.03815 | CLL#28A |
| mcMBL-18 | PBMC, LC-MBL            | IGHV1-2  | 100   | IGHD2-21 | IGHJ6 | ARVQSGRDPYYYYGMDV        | 17 | 0.00077 | CLL#28A |
| bMBL-10  | Normal B cells, LC-MBL  | IGHV1-2  | 99.65 | IGHD3-10 | IGHJ6 | ARDGSGSYKYYYYGMDV        | 17 | 0.00029 | CLL#28A |
| bMBL-10  | Normal B cells, LC-MBL  | IGHV1-2  | 100   | IGHD7-27 | IGHJ6 | ARERTGAFYYYYGMDV         | 17 | 0.00029 | CLL#28A |
| bMBL-13  | Normal B cells, LC-MBL  | IGHV1-2  | 100   | IGHD2-21 | IGHJ6 | ARGGLGWLNYYYYYGMDV       | 17 | 0.00289 | CLL#28A |
| bMBL-17  | Normal B cells, LC-MBL  | IGHV1-2  | 99.65 | IGHD2-8  | IGHJ6 | AACTNGVCYYYYGMDV         | 17 | 0.01906 | CLL#28A |
| bMBL-17  | Normal B cells, LC-MBL  | IGHV1-2  | 99.65 | IGHD2-8  | IGHJ6 | AACTNGVCCYYYYGMDV        | 17 | 0.00028 | CLL#28A |
| bMBL-17  | Normal B cells, LC-MBL  | IGHV1-2  | 100   | IGHD6-6  | IGHJ6 | ACSSPGPAPYYYYGMDV        | 17 | 0.00028 | CLL#28A |
| bMBL-17  | Normal B cells, LC-MBL  | IGHV1-2  | 99.65 | IGHD2-8  | IGHJ6 | VACTNGVCYYYYGMDV         | 17 | 0.00028 | CLL#28A |
| bMBL-19  | Normal B cells, LC-MBL  | IGHV1-2  | 99.65 | IGHD1-1  | IGHJ6 | ARGYYGNIVYYYYGMDV        | 17 | 0.00029 | CLL#28A |
| bMBL-3   | Normal B cells, LC-MBL  | IGHV1-2  | 99.31 | IGHD6-19 | IGHJ6 | ARHSSGWYAYYYYYGMDV       | 17 | 0.06555 | CLL#28A |
| bMBL-3   | Normal B cells, LC-MBL  | IGHV1-2  | 100   | IGHD6-19 | IGHJ6 | ARHCSGWYAYYYYYGMDV       | 17 | 0.00128 | CLL#28A |
| bMBL-3   | Normal B cells, LC-MBL  | IGHV1-2  | 100   | IGHD6-19 | IGHJ6 | ARHSSGWYVYYYYGMDV        | 17 | 0.00042 | CLL#28A |

|          |                        |          |       |          |       |                        |    |         |         |
|----------|------------------------|----------|-------|----------|-------|------------------------|----|---------|---------|
| naB-1    | Naïve B cells, Healthy | IGHV1-2  | 100   | IGHD6-19 | IGHJ6 | ARDSSGGYYYYYGM DV      | 17 | 0.00034 | CLL#28A |
| naB-2    | Naïve B cells, Healthy | IGHV1-2  | 99.65 | IGHD3-16 | IGHJ6 | ARGWQGGAMYYYYGM DV     | 17 | 0.01103 | CLL#28A |
| MBL-2    | MBL cells, LC-MBL      | IGHV3-48 | 99.65 | IGHD2-15 | IGHJ6 | ARDSPLVVVAIIYYYYGM DV  | 21 | 0.00117 | CLL#64B |
| MBL-3    | MBL cells, LC-MBL      | IGHV3-48 | 99.65 | IGHD2-15 | IGHJ6 | ARDSPLVVVAIIYYYYGM DV  | 21 | 0.05783 | CLL#64B |
| MBL-4    | MBL cells, LC-MBL      | IGHV3-48 | 99.65 | IGHD2-15 | IGHJ6 | ARDSPLVVVAIIYYYYGM DV  | 21 | 0.01948 | CLL#64B |
| MBL-4    | MBL cells, LC-MBL      | IGHV3-48 | 99.31 | IGHD2-15 | IGHJ6 | ARDSPLVVVAIIYHYHGM DV  | 21 | 0.00035 | CLL#64B |
| MBL-4    | MBL cells, LC-MBL      | IGHV3-48 | 99.31 | IGHD2-15 | IGHJ6 | ARDSPLVVVAIIYYYYDGM DV | 21 | 0.00035 | CLL#64B |
| MBL-4    | MBL cells, LC-MBL      | IGHV3-48 | 99.65 | IGHD2-15 | IGHJ6 | ARDSPLVVVAIIYYYYGV DV  | 21 | 0.00035 | CLL#64B |
| mcMBL-20 | PBMC, LC-MBL           | IGHV3-48 | 99.31 | IGHD2-15 | IGHJ6 | ARDSPLVVVAIIYYYYGM DV  | 21 | 0.2797  | CLL#64B |
| bMBL-10  | Normal B cells, LC-MBL | IGHV3-48 | 100   | IGHD2-15 | IGHJ6 | ATWGDIVVAKSDYYYYGM DV  | 21 | 0.00446 | CLL#64B |
| bMBL-10  | Normal B cells, LC-MBL | IGHV3-48 | 100   | IGHD2-15 | IGHJ6 | AKDIVVVVAATLGDYYYGM DV | 21 | 0.00029 | CLL#64B |
| bMBL-10  | Normal B cells, LC-MBL | IGHV3-48 | 100   | IGHD2-21 | IGHJ6 | ARDAPPVVVTNRYYYYGM DV  | 21 | 0.00029 | CLL#64B |
| bMBL-10  | Normal B cells, LC-MBL | IGHV3-48 | 100   | IGHD2-21 | IGHJ6 | ARDFFSVVIALLTPDYGM DV  | 21 | 0.00029 | CLL#64B |
| bMBL-1   | Normal B cells, LC-MBL | IGHV3-48 | 100   | IGHD2-2  | IGHJ6 | AREAIVVVPAASLDYYYYM DV | 21 | 0.00266 | CLL#64B |
| bMBL-1   | Normal B cells, LC-MBL | IGHV3-48 | 100   | IGHD2-15 | IGHJ6 | AKDGVVVVAAYLYYYYYM DV  | 21 | 0.00029 | CLL#64B |
| bMBL-13  | Normal B cells, LC-MBL | IGHV3-48 | 100   | IGHD2-21 | IGHJ6 | ARATIVVVTAPEYYYYGM DV  | 21 | 0.00354 | CLL#64B |
| bMBL-13  | Normal B cells, LC-MBL | IGHV3-48 | 100   | IGHD2-2  | IGHJ6 | AKDLAVVVPAALRYYYYYM DV | 21 | 0.00032 | CLL#64B |
| bMBL-13  | Normal B cells, LC-MBL | IGHV3-48 | 99.65 | IGHD2-21 | IGHJ6 | ARATIVVVTAPEYYYYGID V  | 21 | 0.00032 | CLL#64B |
| bMBL-13  | Normal B cells, LC-MBL | IGHV3-48 | 100   | IGHD2-21 | IGHJ6 | ARATIVVVTTPEYYYYGM DV  | 21 | 0.00032 | CLL#64B |
| bMBL-14  | Normal B cells, LC-MBL | IGHV3-48 | 98.26 | IGHD2-15 | IGHJ5 | ARGRREVVGARVYVPPGF DP  | 21 | 0.00408 | CLL#64B |
| bMBL-14  | Normal B cells, LC-MBL | IGHV3-48 | 98.26 | IGHD2-15 | IGHJ5 | ARGRREVVGARAYVPPGF DP  | 21 | 0.00037 | CLL#64B |
| bMBL-17  | Normal B cells, LC-MBL | IGHV3-48 | 100   | IGHD2-21 | IGHJ6 | ARDAPPVVVTNRYYYYGM DV  | 21 | 0.01451 | CLL#64B |
| bMBL-17  | Normal B cells, LC-MBL | IGHV3-48 | 99.31 | IGHD2-2  | IGHJ6 | AREDIVVVPAAPSHYYYYM DV | 21 | 0.01081 | CLL#64B |
| bMBL-17  | Normal B cells, LC-MBL | IGHV3-48 | 100   | IGHD2-21 | IGHJ6 | ARDAPPVVVANRYYYYGM DV  | 21 | 0.00028 | CLL#64B |
| bMBL-19  | Normal B cells, LC-MBL | IGHV3-48 | 99.65 | IGHD2-15 | IGHJ6 | ARESVVVVAATGGYHYHGM DV | 21 | 0.00029 | CLL#64B |
| bMBL-3   | Normal B cells, LC-MBL | IGHV3-48 | 100   | IGHD2-2  | IGHJ6 | ARDDVVVVPAARVHYHGM DV  | 21 | 0.00042 | CLL#64B |
| naB-1    | Naïve B cells, Healthy | IGHV3-48 | 100   | IGHD2-15 | IGHJ6 | ASTFDPVVVQSDYYYYGM DV  | 21 | 0.00734 | CLL#64B |
| naB-2    | Naïve B cells, Healthy | IGHV3-48 | 99.31 | IGHD2-2  | IGHJ6 | ARAGVTVVVPAATDYYYGM DV | 21 | 0.0004  | CLL#64B |
| naB-3    | Naïve B cells, Healthy | IGHV3-48 | 100   | IGHD2-2  | IGHJ6 | ARDLMVVVPAALYYYYHGM DV | 21 | 0.00273 | CLL#64B |
| naB-3    | Naïve B cells, Healthy | IGHV3-48 | 99.31 | IGHD2-2  | IGHJ6 | ARDLMVVVPAALYYCYHGM DV | 21 | 0.00112 | CLL#64B |

|         |                         |          |       |          |       |                         |    |         |         |
|---------|-------------------------|----------|-------|----------|-------|-------------------------|----|---------|---------|
| naB-5   | Naïve B cells, Healthy  | IGHV3-48 | 99.65 | IGHD2-2  | IGHJ6 | ARDRDIVVVPAAMPYYYYMDV   | 21 | 0.00024 | CLL#64B |
| naB-5   | Naïve B cells, Healthy  | IGHV3-48 | 95.4  | IGHD2-2  | IGHJ6 | ARINRVVVVPAAIYYYYYYMDV  | 21 | 0.00024 | CLL#64B |
| naB-5   | Naïve B cells, Healthy  | IGHV3-48 | 95.37 | IGHD2-2  | IGHJ6 | ARVNIVVVVPAAMWGPYYYYMDV | 21 | 0.00024 | CLL#64B |
| MBL-5   | MBL cells, LC-MBL       | IGHV4-4  | 95.44 | IGHD6-19 | IGHJ4 | ARGDRSSGWYFYFDY         | 14 | 0.00051 | CLL#77  |
| bMBL-3  | Normal B cells, LC-MBL  | IGHV4-59 | 100   | IGHD6-19 | IGHJ4 | ARGPDSSGWEPFDY          | 14 | 0.00042 | CLL#77  |
| naB-1   | Naïve B cells, Healthy  | IGHV4-59 | 96.13 | IGHD6-19 | IGHJ4 | ARGAYSSGWYQFDY          | 14 | 0.00664 | CLL#77  |
| naB-1   | Naïve B cells, Healthy  | IGHV4-59 | 98.95 | IGHD6-19 | IGHJ4 | ARGLYSSGWYFYFDY         | 14 | 0.00034 | CLL#77  |
| naB-1   | Naïve B cells, Healthy  | IGHV4-59 | 98.95 | IGHD6-19 | IGHJ4 | ARGLYSSGWYFYFDY         | 14 | 0.00244 | CLL#77  |
| naB-2   | Naïve B cells, Healthy  | IGHV4-59 | 99.65 | IGHD6-19 | IGHJ4 | ARGRYRSGWYFYFDY         | 14 | 0.0004  | CLL#77  |
| naB-2   | Naïve B cells, Healthy  | IGHV4-59 | 100   | IGHD6-19 | IGHJ4 | ARGRYSSGWYFYFDY         | 14 | 0.00122 | CLL#77  |
| naB-2   | Naïve B cells, Healthy  | IGHV4-59 | 100   | IGHD6-19 | IGHJ5 | ARGVGGSGWIWFDP          | 14 | 0.0004  | CLL#77  |
| naB-3   | Naïve B cells, Healthy  | IGHV4-4  | 99.65 | IGHD6-19 | IGHJ3 | ARGWVLSGWYSFDI          | 14 | 0.00016 | CLL#77  |
| naB-3   | Naïve B cells, Healthy  | IGHV4-59 | 99.65 | IGHD6-19 | IGHJ3 | ARGWVLSGWYSFDI          | 14 | 0.00016 | CLL#77  |
| meB-1   | Memory B cells, Healthy | IGHV4-59 | 98.6  | IGHD6-19 | IGHJ4 | ARGLCSSGWYFYFDY         | 14 | 0.00017 | CLL#77  |
| meB-1   | Memory B cells, Healthy | IGHV4-59 | 98.95 | IGHD6-19 | IGHJ4 | ARGLYSSGWHYFYFDY        | 14 | 0.00017 | CLL#77  |
| meB-1   | Memory B cells, Healthy | IGHV4-59 | 98.95 | IGHD6-19 | IGHJ4 | ARGLYSSGWNYFYFDY        | 14 | 0.00017 | CLL#77  |
| meB-1   | Memory B cells, Healthy | IGHV4-59 | 98.95 | IGHD6-19 | IGHJ4 | ARGLYSSGWYFYFDY         | 14 | 0.01429 | CLL#77  |
| meB-1   | Memory B cells, Healthy | IGHV4-59 | 98.95 | IGHD6-19 | IGHJ4 | ARGLYSSGWYFYFNY         | 14 | 0.00017 | CLL#77  |
| naB-2   | Naïve B cells, Healthy  | IGHV4-34 | 96.91 | IGHD3-3  | IGHJ4 | ARRKDFWSGYLSFYFDY       | 17 | 0.0004  | CLL#201 |
| bMBL-1  | Normal B cells, LC-MBL  | IGHV3-23 | 96.88 | IGHD4-17 | IGHJ6 | ARGGYGDYVGSMDV          | 14 | 0.00029 | CLL#202 |
| bMBL-17 | Normal B cells, LC-MBL  | IGHV3-33 | 100   | IGHD4-17 | IGHJ4 | ARGGDGDYGGGLDY          | 14 | 0.00085 | CLL#202 |
| bMBL-17 | Normal B cells, LC-MBL  | IGHV3-33 | 99.65 | IGHD4-17 | IGHJ4 | ARGLYGDYAPDFDY          | 14 | 0.00028 | CLL#202 |
| naB-5   | Naïve B cells, Healthy  | IGHV3-11 | 100   | IGHD4-17 | IGHJ4 | ARGGKGDYQEDFDY          | 14 | 0.02528 | CLL#202 |
| naB-5   | Naïve B cells, Healthy  | IGHV3-30 | 100   | IGHD4-17 | IGHJ4 | ARGGKGDYQEDFDY          | 14 | 0.00024 | CLL#202 |
| naB-5   | Naïve B cells, Healthy  | IGHV3-11 | 100   | IGHD4-17 | IGHJ4 | ARGGKGDYQEDFGY          | 14 | 0.00024 | CLL#202 |
| naB-5   | Naïve B cells, Healthy  | IGHV3-11 | 99.65 | IGHD5-12 | IGHJ4 | ARGGKGDYQGDFDY          | 14 | 0.00024 | CLL#202 |
| meB-5   | Memory B cells, Healthy | IGHV3-11 | 100   | IGHD4-17 | IGHJ4 | ARGGKGDYQEDFDY          | 14 | 0.0003  | CLL#202 |
